# Supplementary material for: Oncogene-mediated metabolic gene signature predicts breast cancer outcome
Source: NPJ Breast Cancer. 2021 Oct 28;7:141. doi: 10.1038/s41523-021-00341-6 (PMC8553750; doi:10.1038/s41523-021-00341-6)
Supplement: Supplementary file 1 — Supplementary Information [file 41523_2021_341_MOESM1_ESM.pdf]

SUPPLEMENTARY INFORMATION

FOR

**Oncogene-Mediated Metabolic Gene Signature Predicts Breast Cancer Outcome**

Merve Aslan<sup>1¶</sup>, En-Chi Hsu<sup>1¶</sup>, Fernando J. Garcia Marques<sup>1</sup>, Abel Bermudez<sup>1</sup>, Shiqin Liu<sup>1</sup>, Michelle Shen<sup>1</sup>, Meredith West<sup>2</sup>, Chiyuan Amy Zhang<sup>2</sup>, Meghan A. Rice<sup>1</sup>, James D. Brooks<sup>2</sup>, Robert West<sup>3</sup>, Sharon J. Pitteri<sup>1</sup>, Balázs Györfy<sup>4, 5</sup> and Tanya Stoyanova<sup>1</sup>

1. Department of Radiology, Canary Center at Stanford for Cancer Early Detection, Stanford University, Stanford, CA, USA. 2. Department of Urology, Stanford University, Stanford, CA, USA  
3. Department of Pathology, Stanford University, Stanford, CA, USA. 4. TTK Lendület Cancer Biomarker Research Group, Research Centre for Natural Sciences, Institute of Enzymology, Magyar Tudósok körútja, 1094 Budapest, Hungary. 5. Semmelweis University, Department of Bioinformatics and 2nd Department of Pediatrics, Tüzoltó utca 7-9, 1094 Budapest, Hungary.

# Supplementary Figure 1

a

HCC1806 Single cell clones

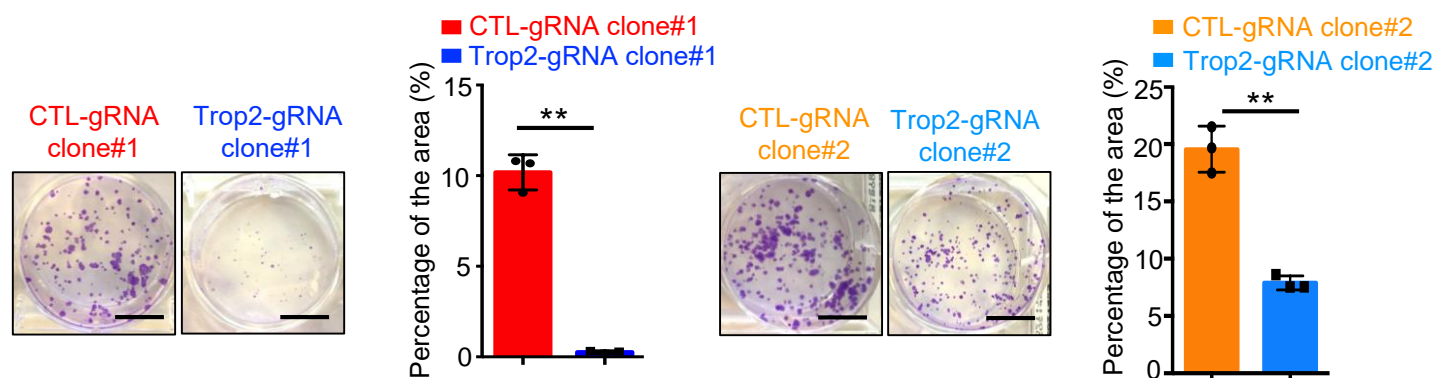

b

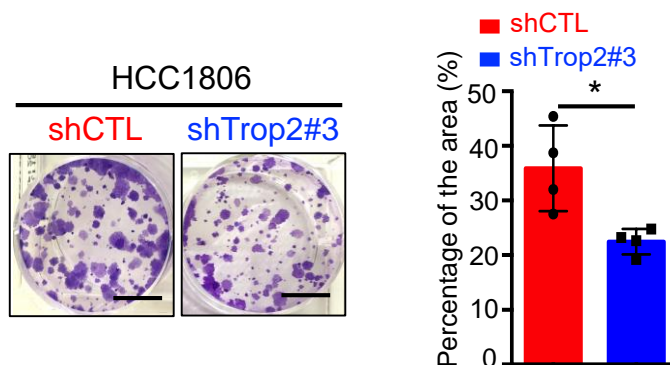

c

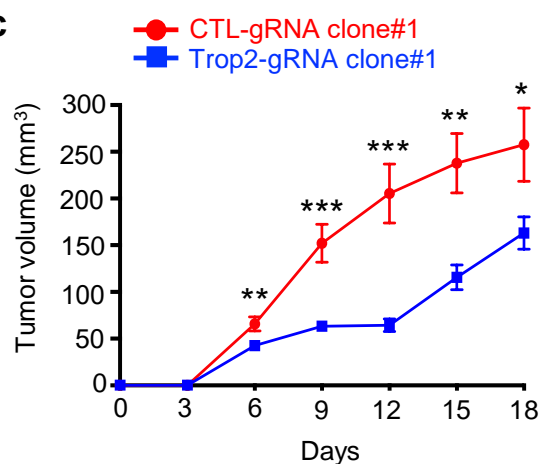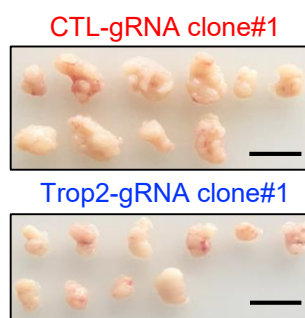

d

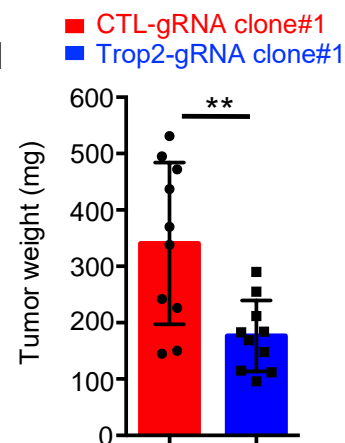

**Supplementary Figure 1. Trop2 regulates TNBC growth *in vitro* and tumor growth *in vivo* (related to Figure 2).** (a) Colony formation assay of HCC1806 CTL-gRNA-clone#1 and Trop2-gRNA-clone#1 (left) and HCC1806 CTL-gRNA-clone#2 and Trop2-gRNA-clone#2 cell lines (right). Representative images of wells after harvesting and staining with crystal violet, and quantification of percent area are shown. (b) Colony formation assay of HCC1806 shCTL and shTrop2#3 cell lines. Representative images (left) and quantification of percent area (right) are shown. Scale bars are 1 cm. Error bars represent SD. (c) Tumor growth curve and (d) tumor weights at the day of harvesting and tumor images of HCC1806 CTL-gRNA-clone#1 (n=10) and Trop2-gRNA-clone#1 (n=10) xenografts. Tumor volumes were measured every three days and calculated (length x width x height)/2. Scale bars are 1 cm. Error bars represent SE. \*  $P < 0.05$ , \*\*  $P < 0.01$ , and \*\*\*  $P < 0.001$  using two tailed Student's *t* test.

# Supplementary Figure 2

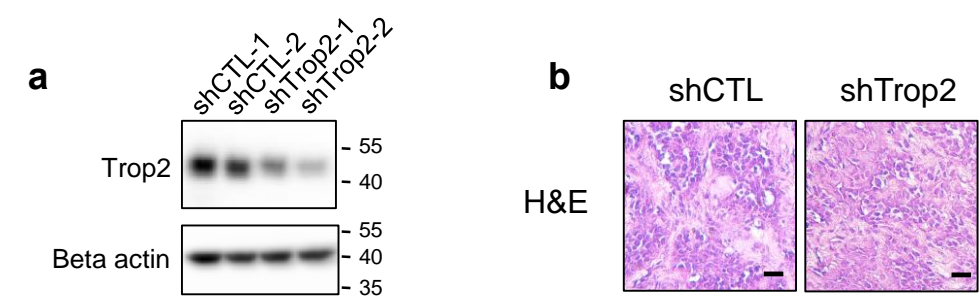

**Supplementary Figure 2. Trop2 levels and histology of Trop2 knockdown xenografts (related to Figure 3).** (a) Trop2 and beta actin expression levels detection in two different xenografts of HCC1806 shCTL and shTrop2#2 used for proteomic analyses by western blot. The two blots were derived from the same experiment and were processed in parallel. Whole blots are shown in Supplementary Figure 11d. (b) H&E staining of HCC1806 shCTL and shTrop2 xenografts.

Supplementary Figure 3

64 Downregulated proteins in Trop2 knockdown xenograft tumors

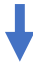

13 TALDO1 associated metabolic proteins from STRING

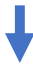

7 metabolic proteins

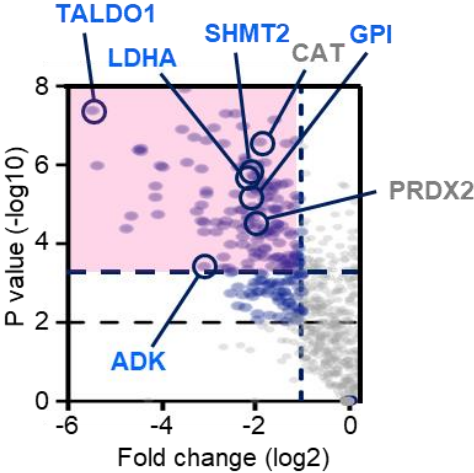

Cut off:

- p value <0.0005
- fold change (downregulated proteins) >2

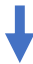

5 TNBC enriched metabolic genes

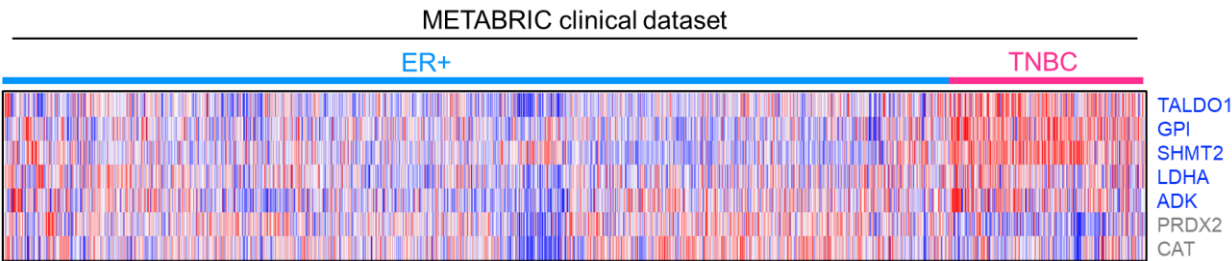

**Supplementary Figure 3. Flow chart of candidate selection (related to Figure 3).** 64 candidate proteins downregulated by Trop2 were identified utilizing *in vivo* tumor proteomic profiling. 13 metabolic proteins were further determined using STRING functional analysis database (Figure 3). 7 metabolic proteins (TALDO1, GPI, SHMT2, LDHA, ADK, PRDX2, and CAT) were selected based on more stringent cut off (fold change > 2 and p value < 0.0005). TALDO1, GPI, SHMT2, LDHA and ADK but not PRDX2 and CAT were enriched in TNBC in METABRIC clinical dataset. TALDO1, GPI, SHMT2, LDHA, ADK were selected as 5 metabolic genes for further analyses.

# Supplementary Figure 4

METABRIC clinical dataset

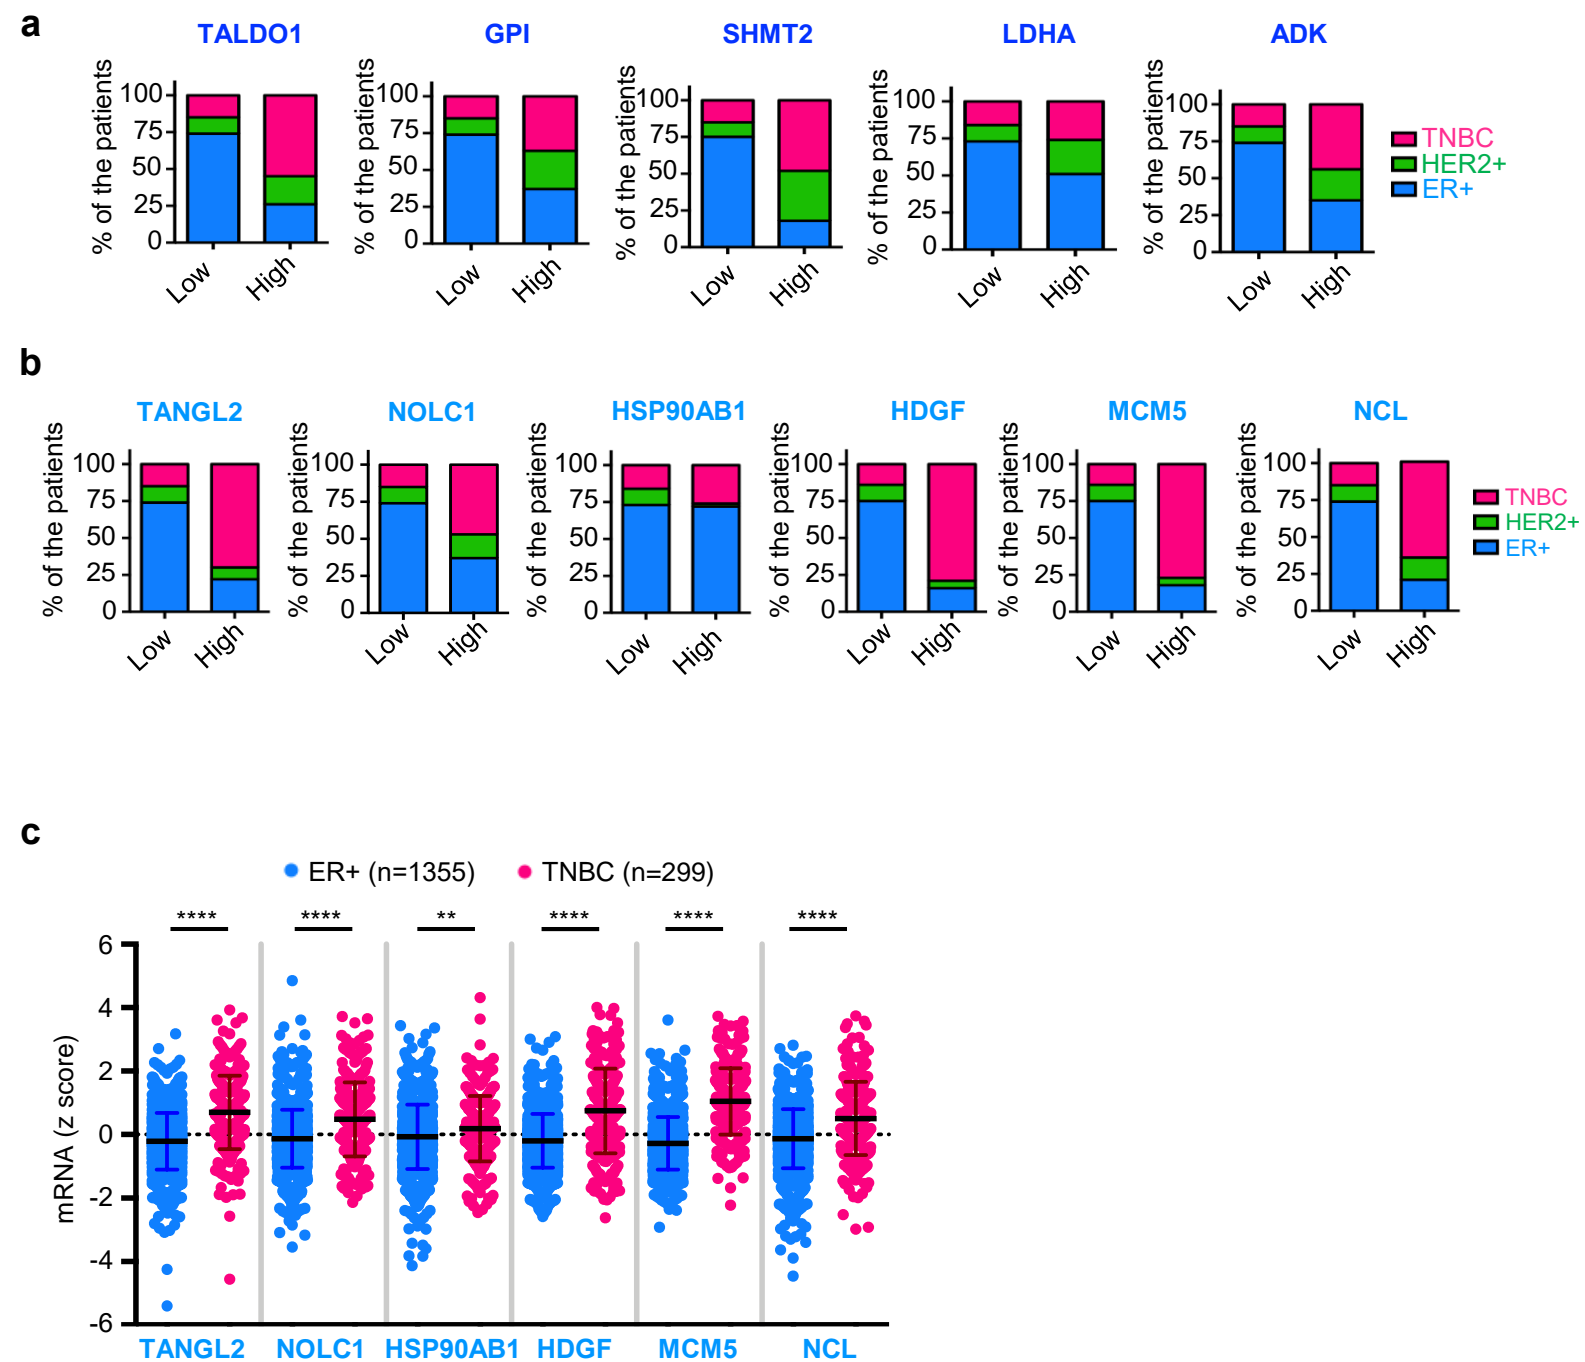

**Supplementary Figure 4. Decreased metabolic proteins and known oncogenic proteins upon Trop2 knockdown are elevated in TNBC patient samples (related to Figure 4).** (a) Trop2 related metabolic genes expression levels in ER+, HER2+ and TNBC patients from METABRIC clinical dataset (bar graphs). Patients were classified as mRNA z score high (more than 2) and low (less than 2) for each gene expression and the percentage of ER +, HER2+, or TNBC patients in each group is displayed. (b) Trop2 related known oncogenes expression levels in ER+, Her2+, and TNBC patients from METABRIC clinical cohort (bar graph). (c) Trop2 mediated known oncogenes expression levels are shown in ER+ and TNBC patients from METABRIC dataset (dot blot). Error bars represent standard deviation. Adjusted *P* value, \*\* *P* < 0.01 and \*\*\*\* *P* < 0.0001, was determined by Bonferroni testing.

Supplementary Figure 5

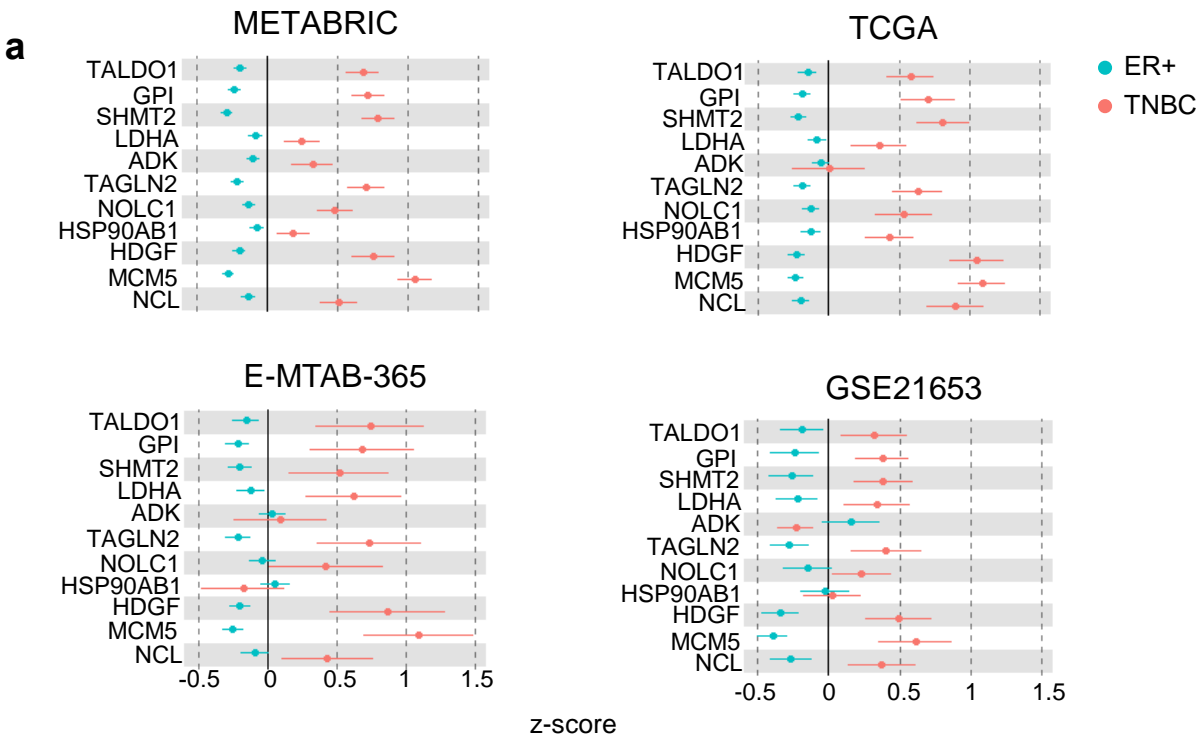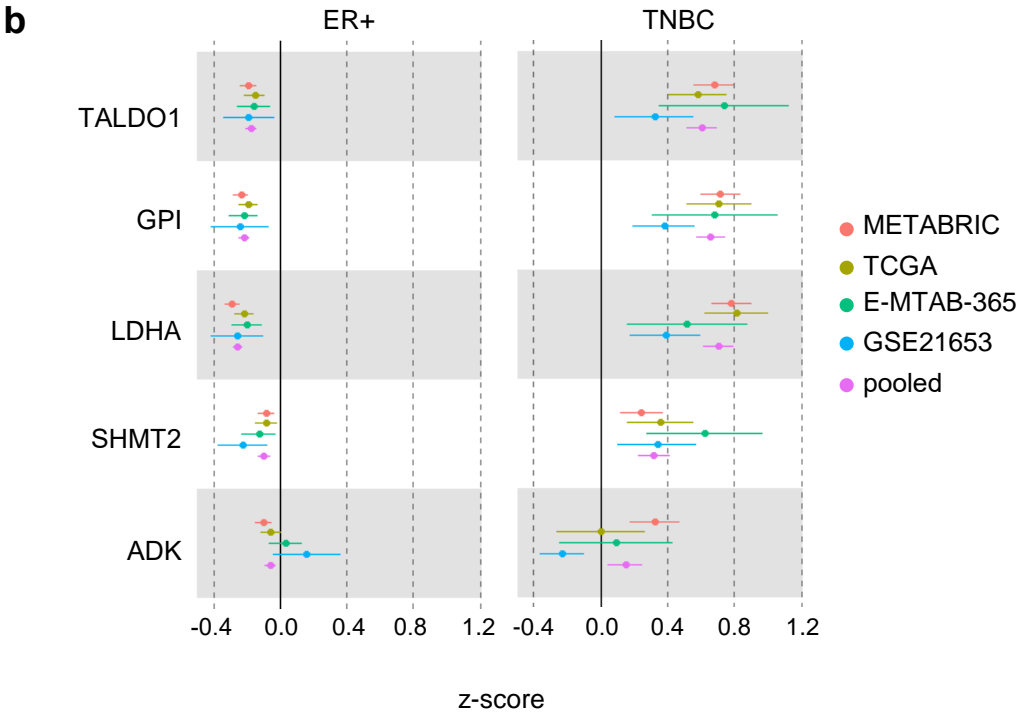

**Supplementary Figure 5. Downregulated metabolic proteins and oncogenic proteins upon Trop2 knockdown are elevated in TNBC patient samples in four different datasets (related to Figure 4).** (a) Five metabolic genes and six oncogenes mRNA z-score levels were analyzed in ER+ and TNBC patients in four different cohorts and presented by forest plot. (b) Five metabolic gene expression levels in four different patient datasets separately and four datasets pooled together were demonstrated by a forest plot. Graphs were plotted in forestplot in R, displaying the mean as a dot and the 95% confidence interval as a line through the mean.

## Supplementary Figure 6

E-MTAB-365 dataset (total n=426)

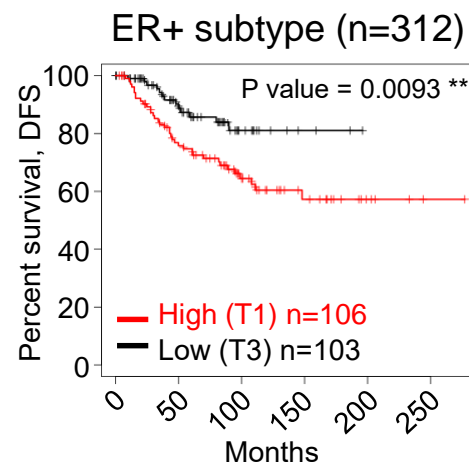

**Supplementary Figure 6. 5-gene metabolic signature is prognostic in ER+ subtype in breast cancer (related to Figure 5C).** Survival plots (relapse-free survival) of ER+ breast cancer patients from E-MTAB-365 clinical datasets that are sorted as tertiles into three subgroups (T1, T2 and T3) based on average mRNA value of 5 metabolic genes per sample from Kaplan-Meier Plotter (<https://kmplot.com/analysis/index.php?p=service>).

# Supplementary Figure 7

## 5-gene metabolic signature (TALDO1, GPI, LDHA, SHMT2, and ADK)

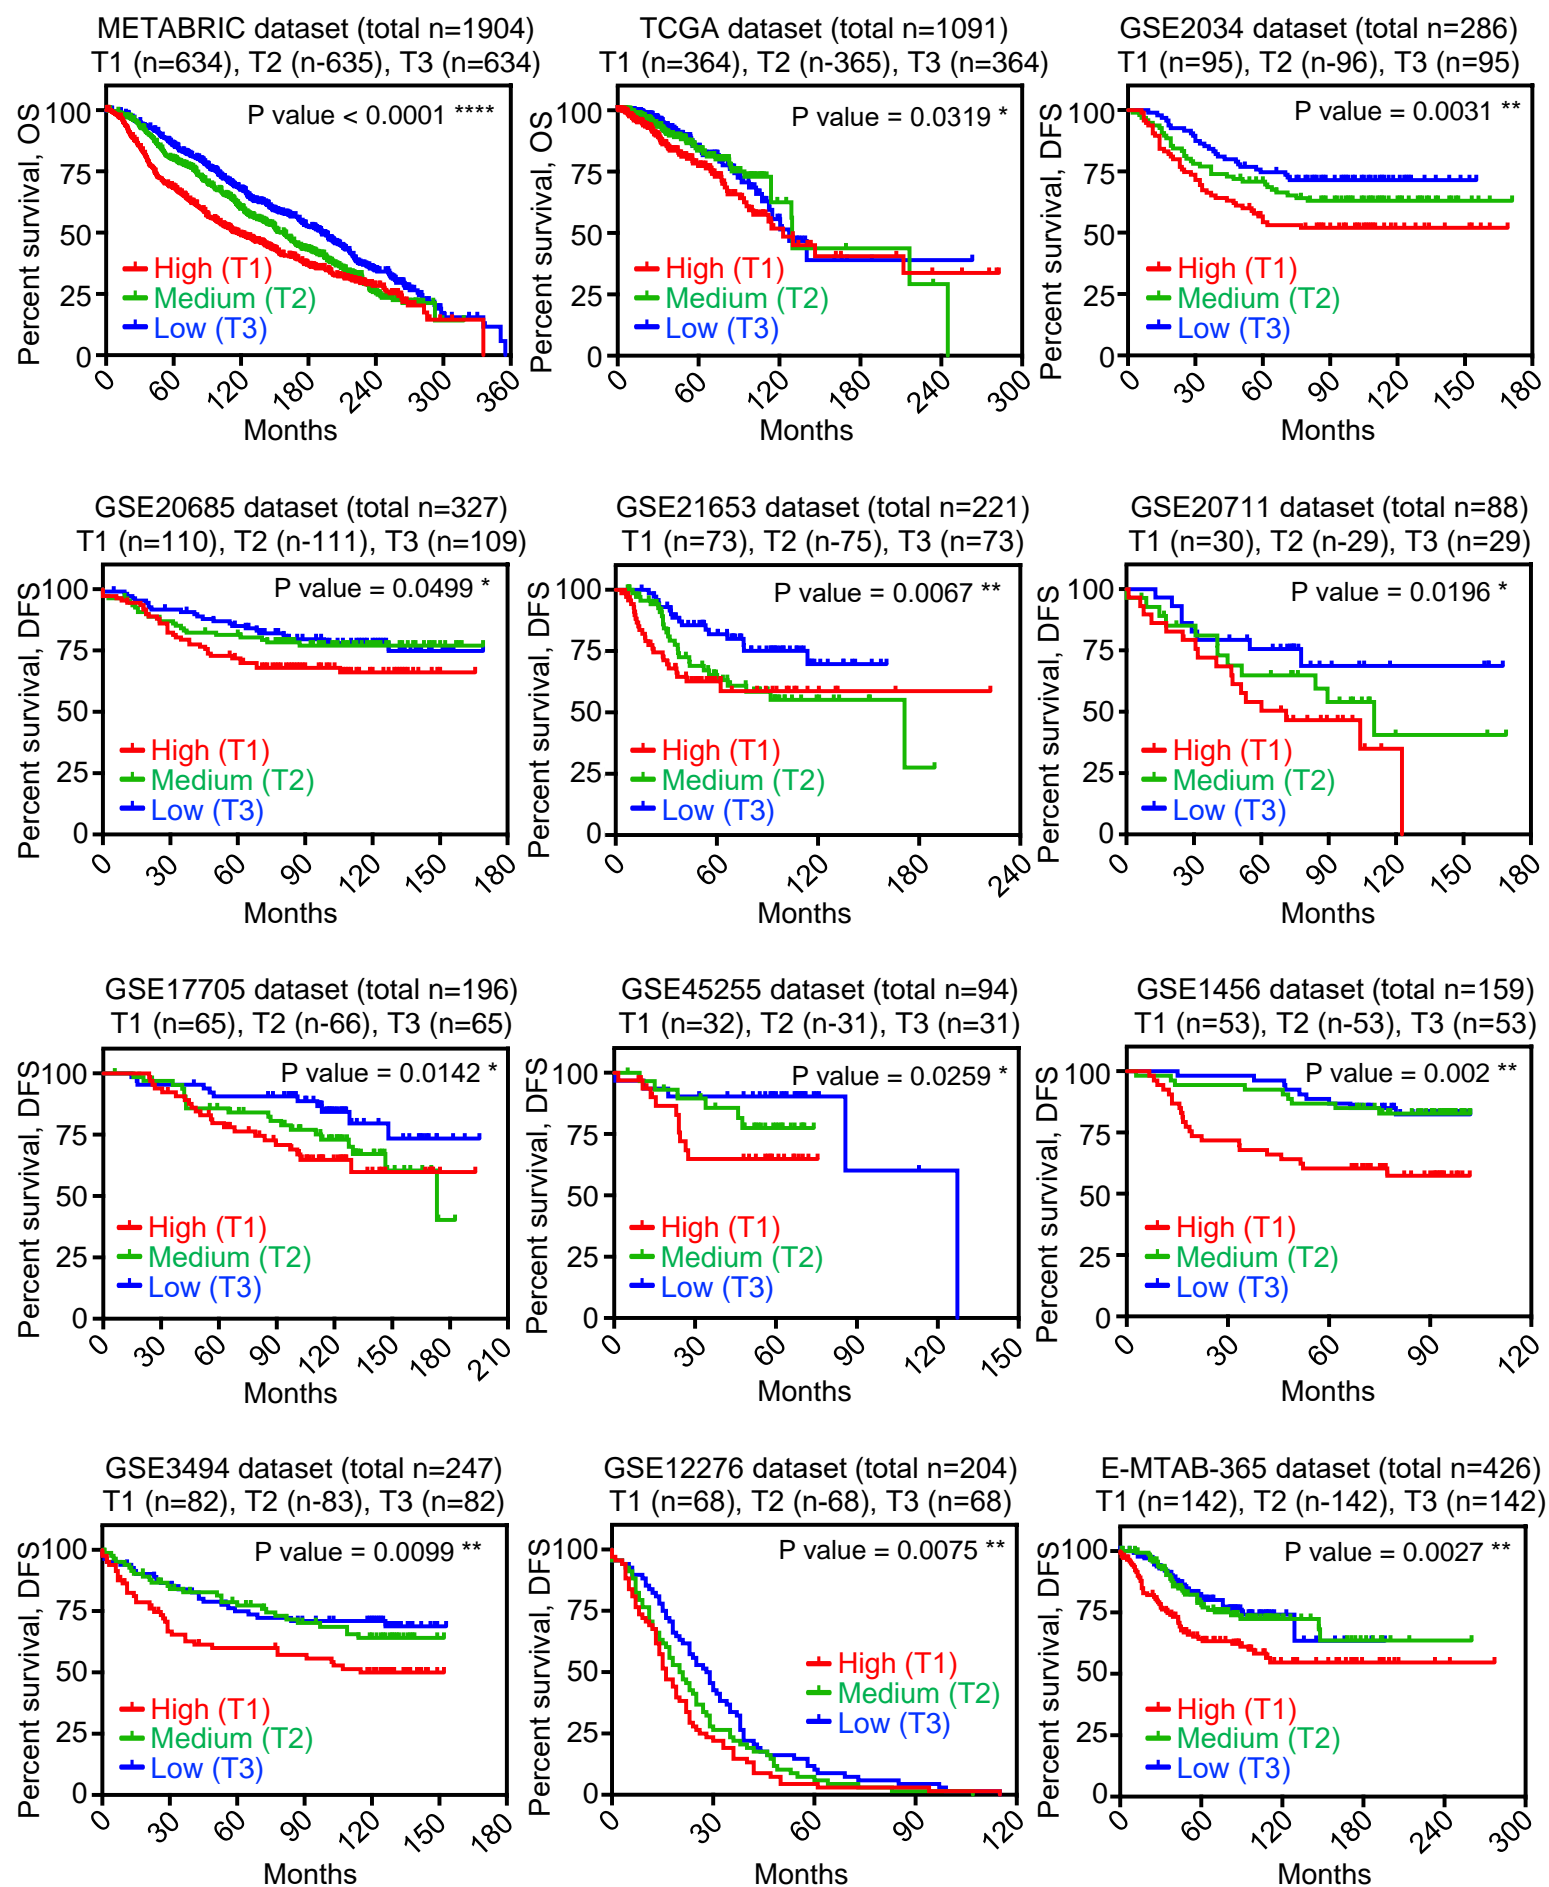

**Supplementary Figure 7. 5-gene metabolic signature is prognostic in breast cancer (related to Figure 6).** Survival plots (overall survival or relapse-free survival) of breast cancer patients from 12 clinical datasets shown in Figure 6 were sorted as tertiles into three subgroups (T1, T2 and T3) based on average mRNA value of 5 metabolic genes per sample.

# Supplementary Figure 8

## Median subgrouping

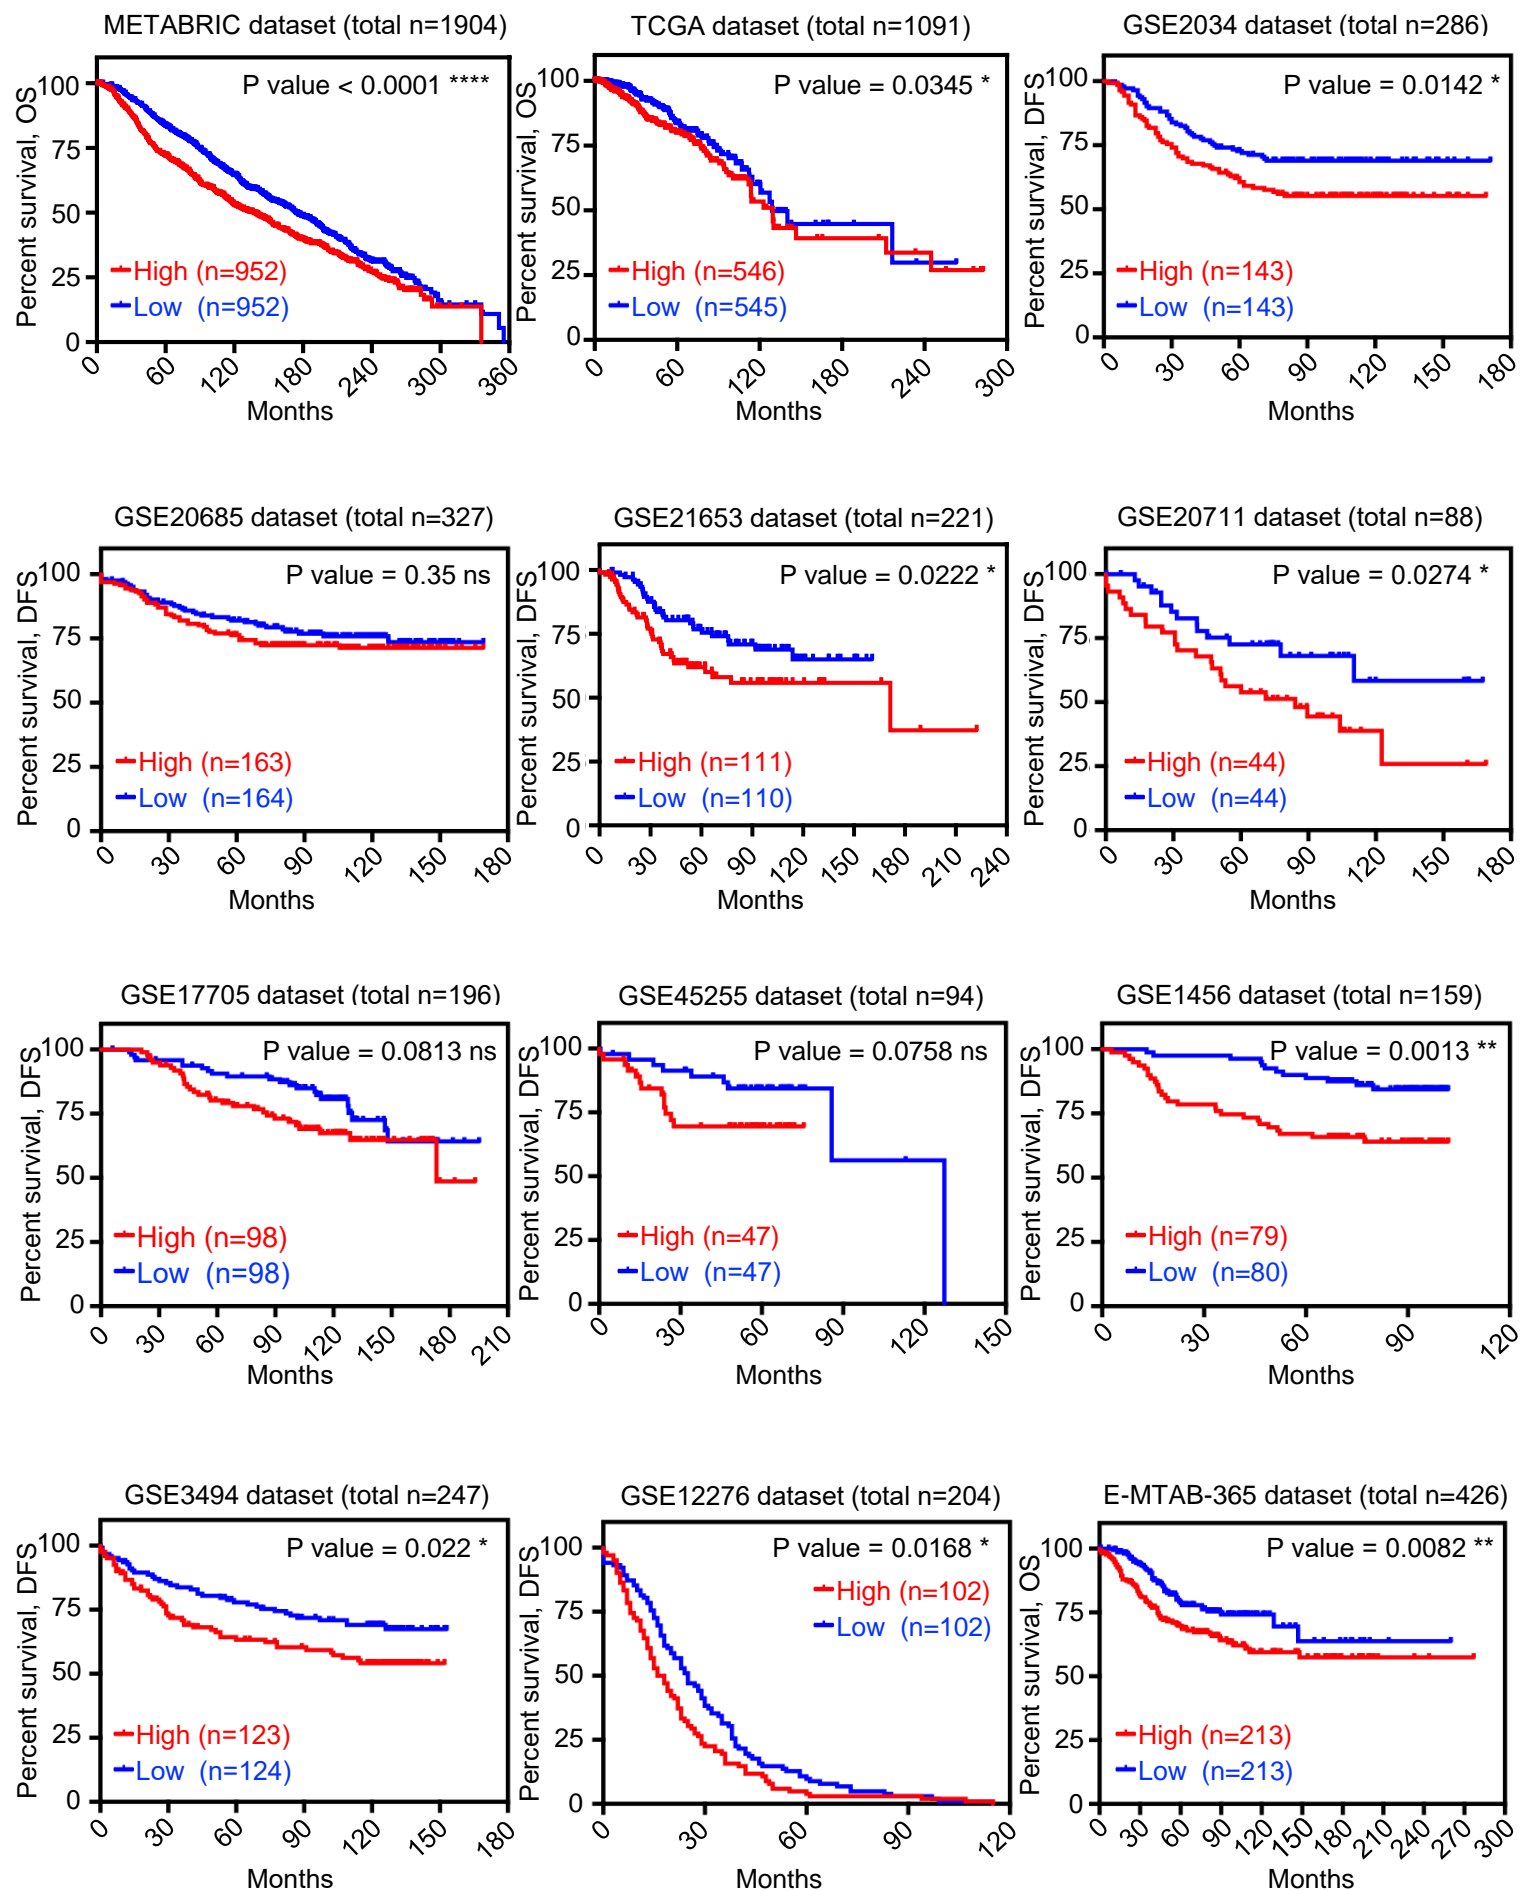

**Supplementary Figure 8. 5-gene metabolic signature is prognostic in breast cancer (related to Figure 6).** Survival plots (overall survival or relapse-free survival) of breast cancer patients from 12 clinical datasets that are sorted to two subgroups based on median of average mRNA value of 5 metabolic genes per sample. P values for the survival analysis were calculated based on Log-Rank Test. \*  $P < 0.05$ , \*\*  $P < 0.01$ , \*\*\*\*  $P < 0.0001$ , and ns = not significant.

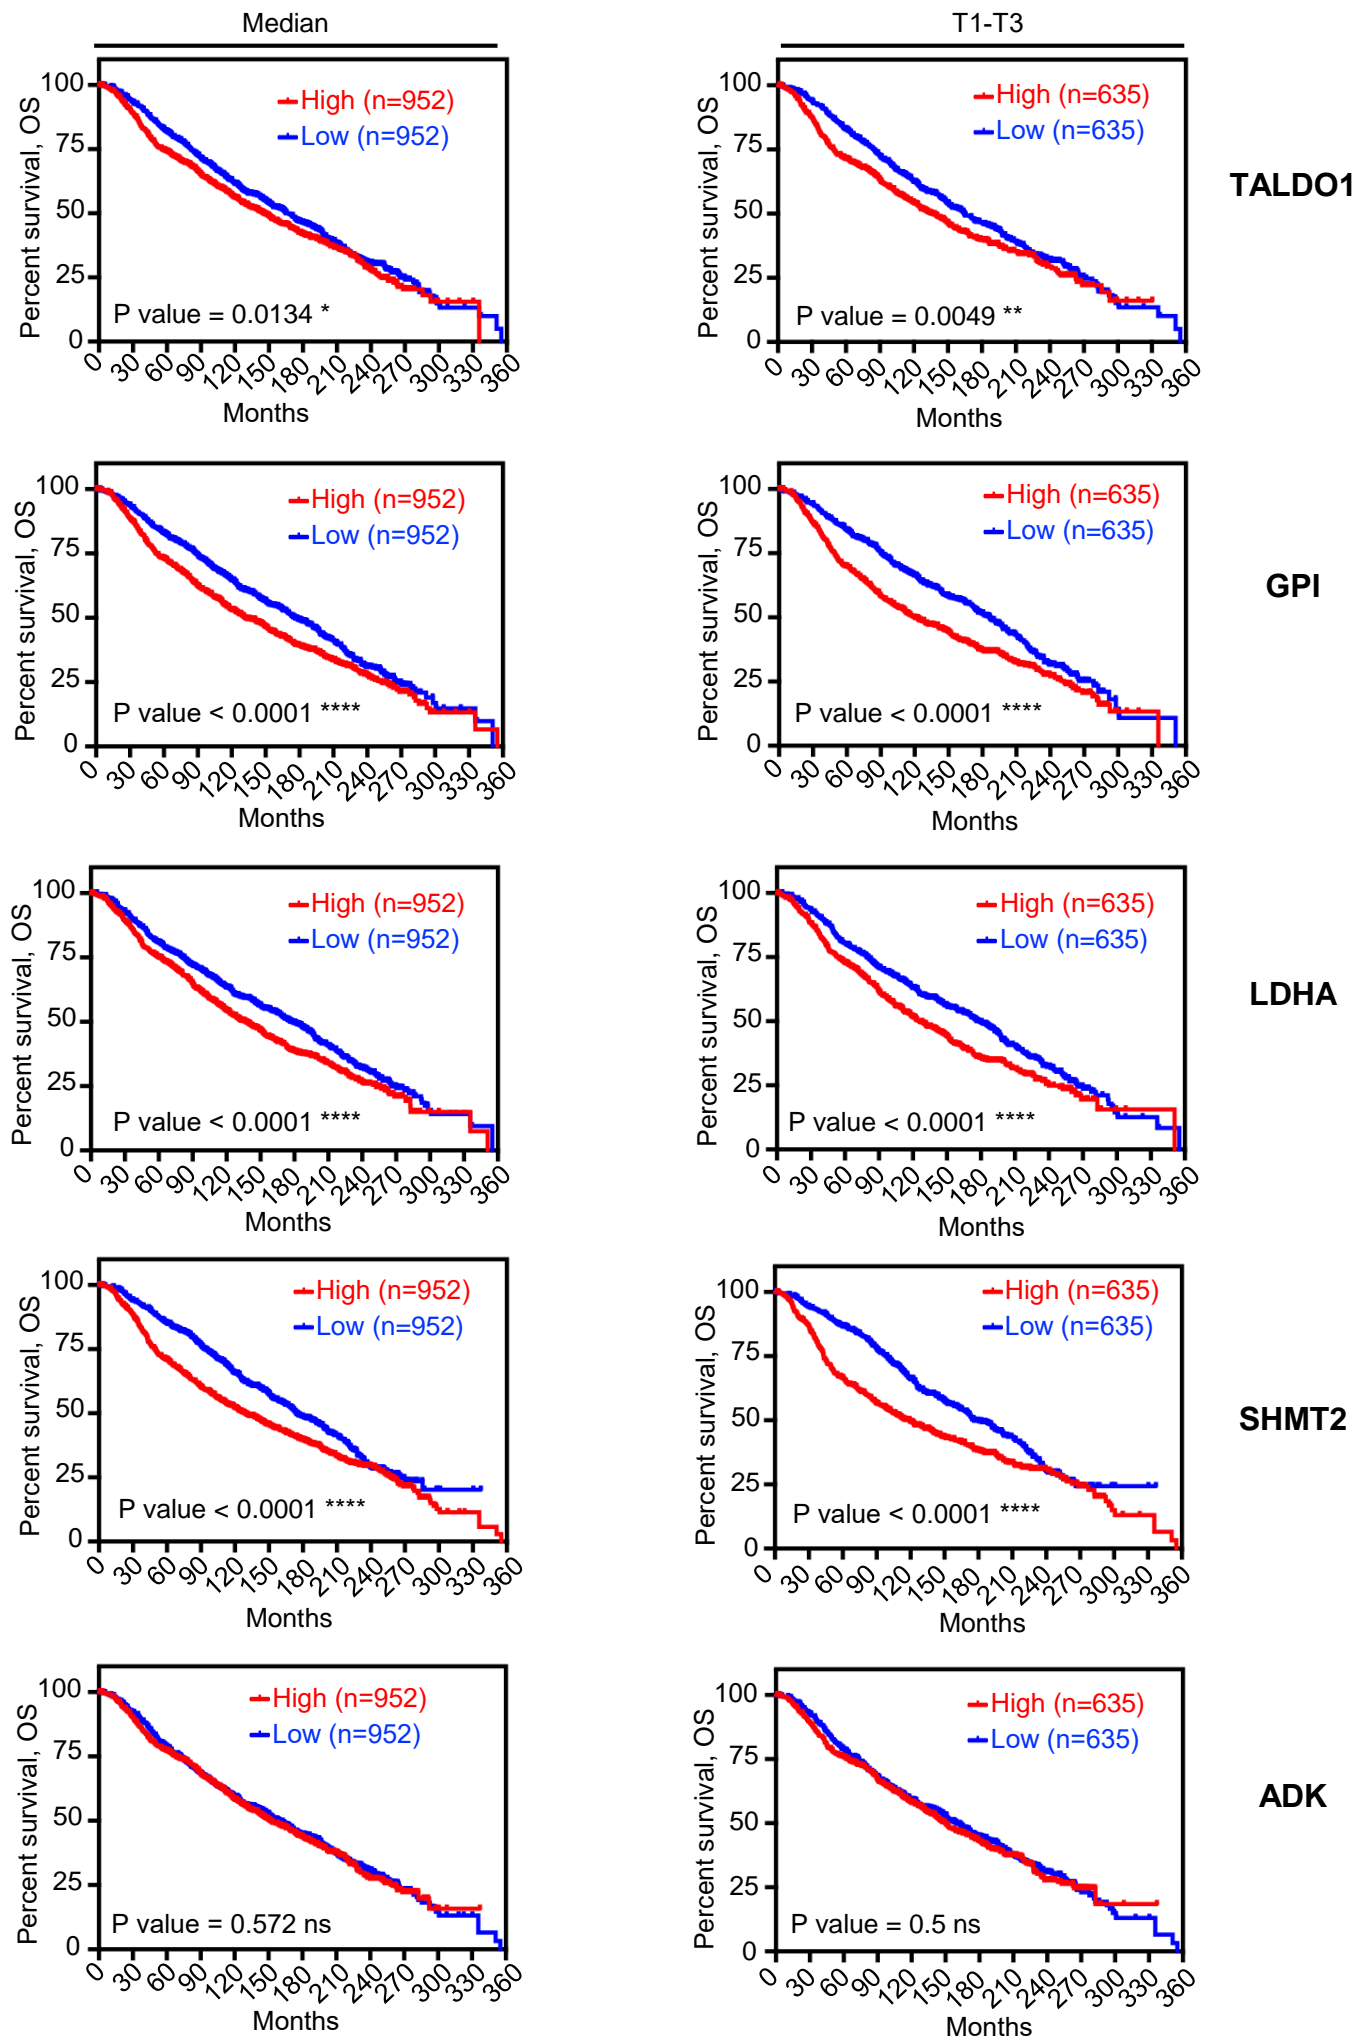

**Supplementary Figure 9. Survival analysis of individual genes of the metabolic signature (Related to Figure 6).** Survival curves of breast cancer patient samples that are subgrouped by median or tertile expression levels of each metabolic gene (TALDO1, GPI, LDHA, SHMT2, and ADK) in METABRIC clinical dataset. P value of survival analysis is calculated based on Log-Rank Test. \*  $P < 0.05$ , \*\*  $P < 0.01$ , \*\*\*\*  $P < 0.0001$ , and ns = not significant.

# Supplementary Figure 10

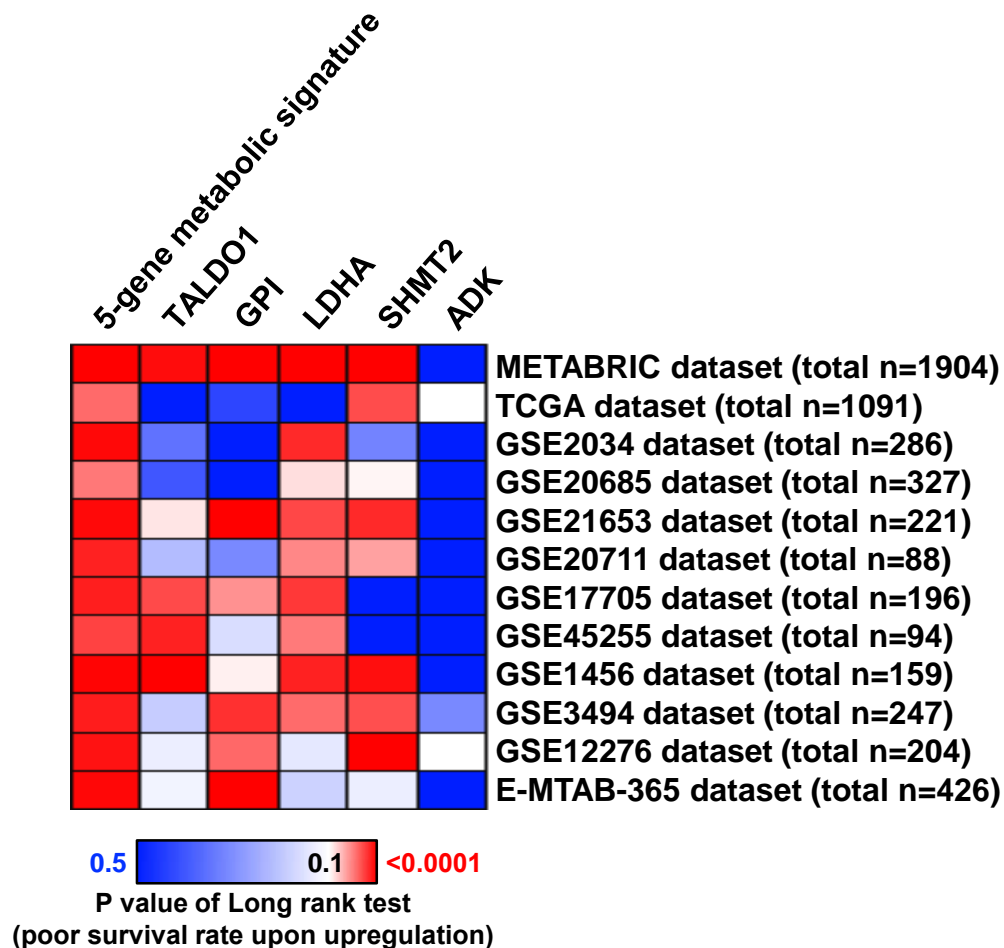

**Supplementary Figure 10. 5-gene metabolic signature correlates with worse outcome in breast cancer when compared to each gene alone (related to Figure 6).** Heatmap of poor survival rate with elevated 5-gene metabolic signature (TALDO1, GPI, LDHA, SHMT2, and ADK) together or each gene alone.

# Supplementary Figure 11

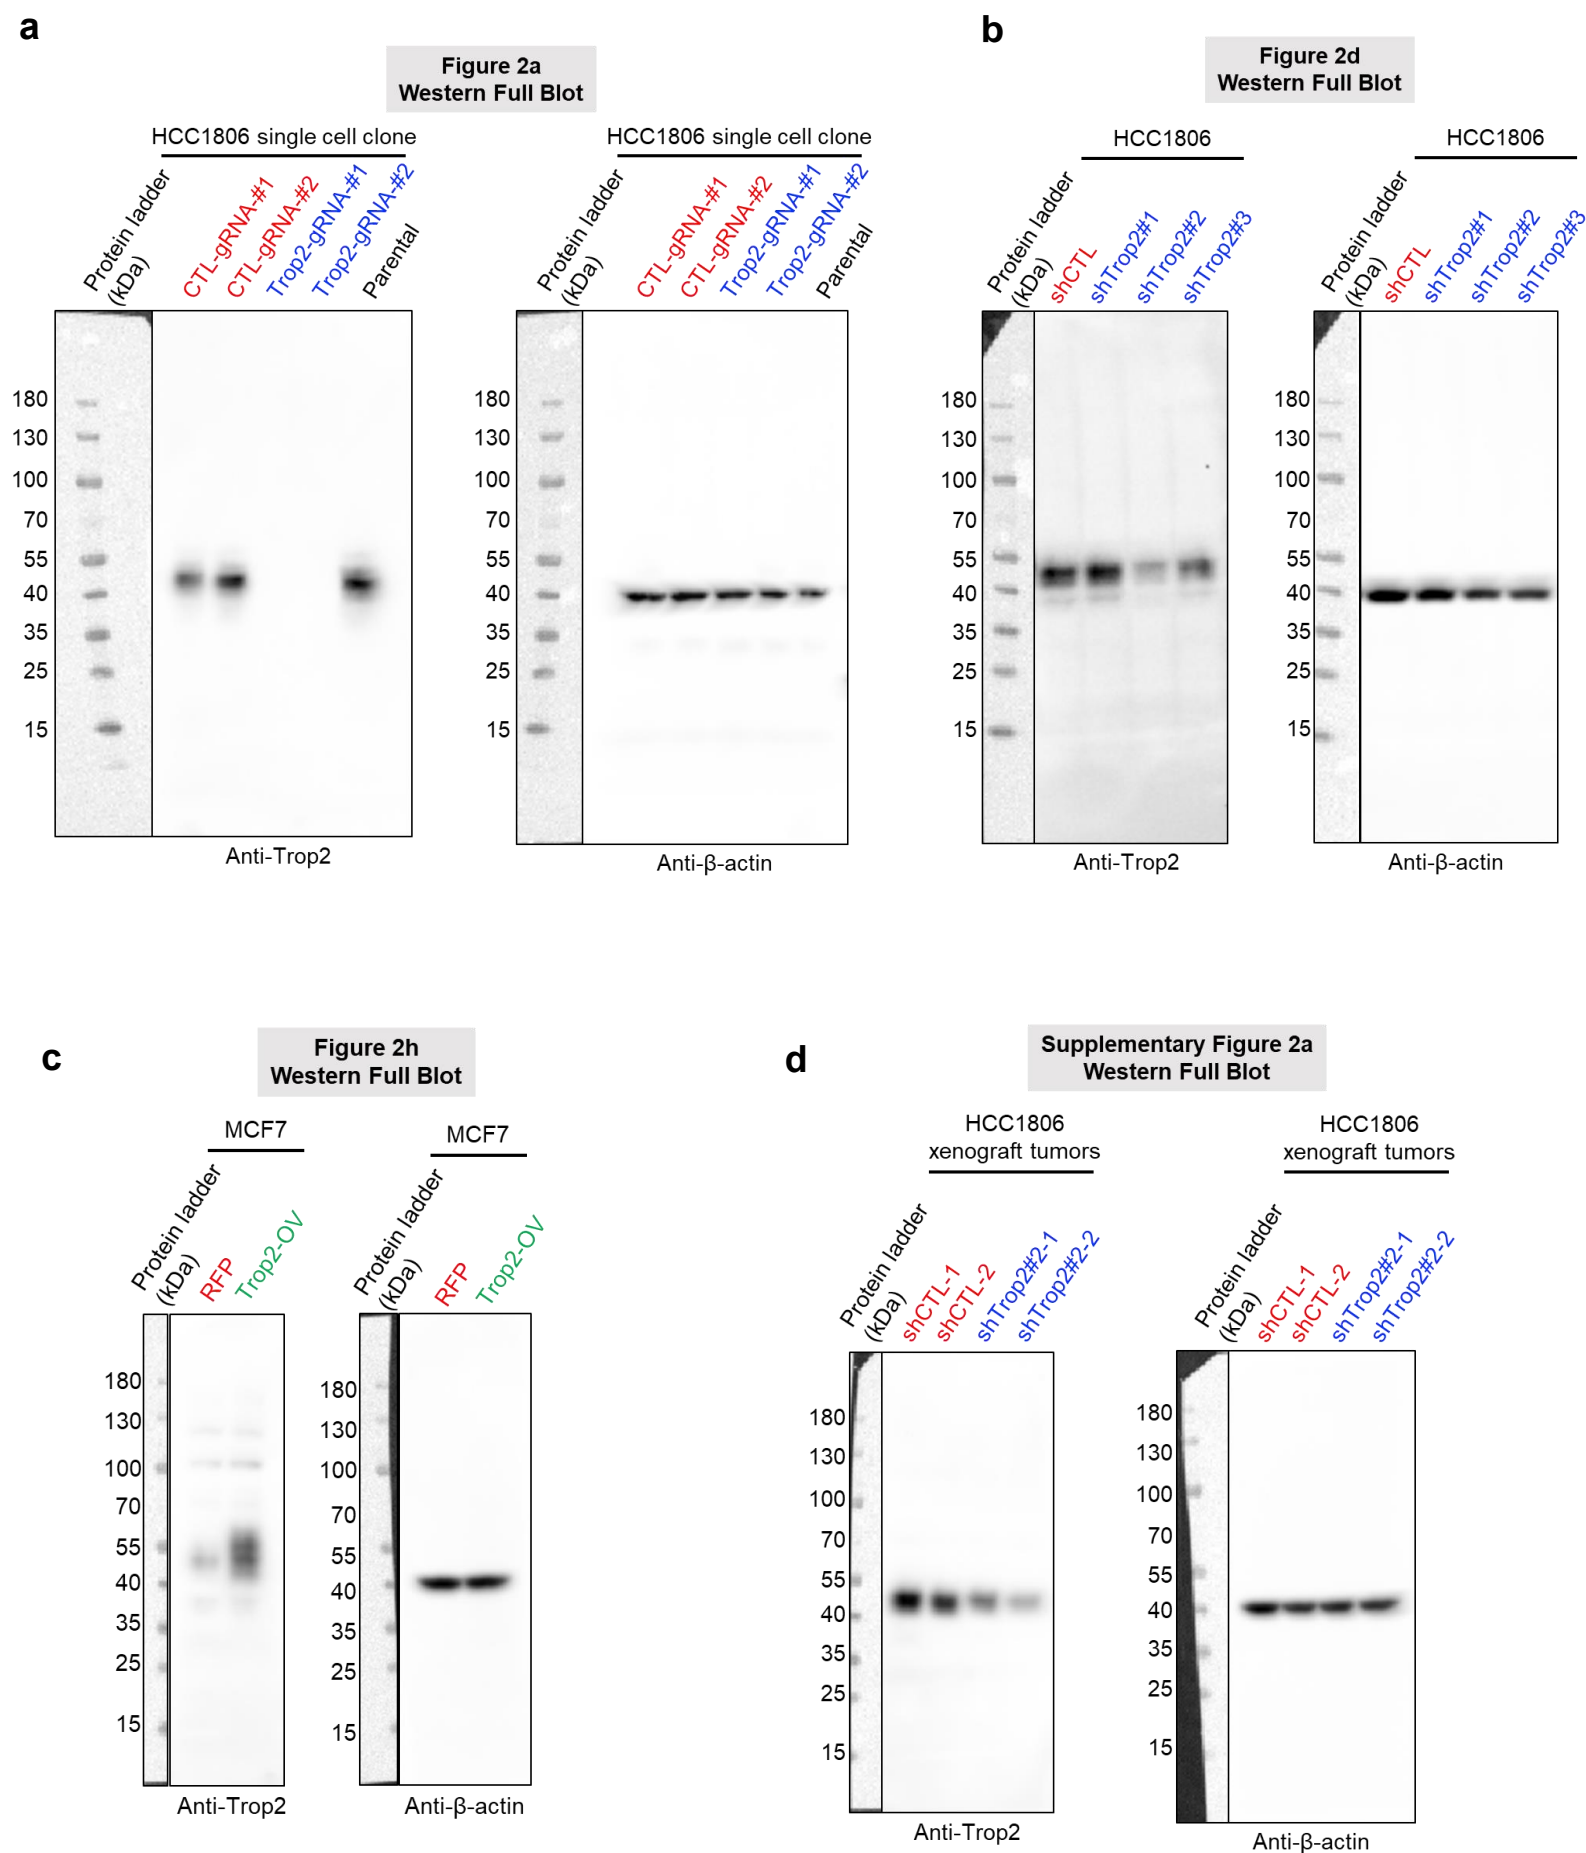

**Supplementary Figure 11. Full, un-cropped images of western blots (related to Figure 2 and Supplementary Figure 2).** Full, un-cropped images of western blots used in (a) Figure 2a, (b) Figure 2d, (c) Figure 2h, and (d) Supplementary Figure 2a are shown.

**Supplementary Table 1.** List of proteins that were upregulated or downregulated upon Trop2 knockdown in TNBC xenografts.

|            | HCC1806 Tumors                      |                                     |                                     |                                     |                                     |                                     |                                       |                                       |                                       |                                       |                                       |                                       |    |            |               |            |              |
|------------|-------------------------------------|-------------------------------------|-------------------------------------|-------------------------------------|-------------------------------------|-------------------------------------|---------------------------------------|---------------------------------------|---------------------------------------|---------------------------------------|---------------------------------------|---------------------------------------|----|------------|---------------|------------|--------------|
| Row Labels | shCTL-tumor#1 technical replicate-1 | shCTL-tumor#1 technical replicate-2 | shCTL-tumor#1 technical replicate-3 | shCTL-tumor#2 technical replicate-1 | shCTL-tumor#2 technical replicate-2 | shCTL-tumor#2 technical replicate-3 | shTrop2-tumor#1 technical replicate-1 | shTrop2-tumor#1 technical replicate-2 | shTrop2-tumor#1 technical replicate-3 | shTrop2-tumor#2 technical replicate-1 | shTrop2-tumor#2 technical replicate-2 | shTrop2-tumor#2 technical replicate-3 | Np | p-value    | -log(p-value) | Average    | Significance |
| TALDO1     | 2.41597729                          | 3.53307646                          | 3.32715352                          | 3.4115596                           | 2.86486436                          | 2.54374611                          | -4.1276305                            | -3.05757                              | -3.5861279                            | -1.8400531                            | -1.5326923                            | -0.8728103                            | 6  | 4.455E-08  | 7.35115538    | -5.5188769 | -40.570122   |
| TAGLN2     | 1.39095262                          | 2.83037134                          | 2.89742828                          | 2.60886193                          | 3.37467381                          | 2.98228843                          | -2.4460671                            | -2.3910654                            | -2.5397602                            | -1.6011195                            | -1.2012376                            | -0.3879965                            | 10 | 3.9246E-07 | 6.4062046     | -4.4419704 | -28.456172   |
| ACTG1      | 0.4487113                           | 1.34405913                          | 1.24566871                          | 1.80300712                          | 1.70330752                          | 1.93577765                          | -2.1787177                            | -1.4853937                            | -1.8078387                            | -2.9495973                            | -3.4608229                            | -3.0992998                            | 11 | 8.9482E-09 | 8.04826209    | -3.9103669 | -31.471658   |
| LGALS3BP   | 1.90887474                          | 2.85151488                          | 3.04711986                          | 2.86928457                          | 3.94962877                          | 2.62797769                          | -0.6929616                            | 0.33422641                            | -0.8812724                            | 0.1852596                             | -1.0968849                            | -0.0227006                            | 13 | 1.5705E-05 | 4.80396987    | -3.2381223 | -15.555842   |
| BCAP31     | 1.36295915                          | 2.21653043                          | 2.19248903                          | 2.62961626                          | 2.01584625                          | 1.69866466                          | -3.0940683                            | -1.3193054                            | -2.3178061                            | 0.39023836                            | 0.12235481                            | -0.0431331                            | 7  | 5.9239E-06 | 5.22739551    | -3.0629709 | -16.01136    |
| NOLC1      | 2.57306921                          | 1.9858549                           | 2.30109911                          | 3.06393837                          | 2.83432459                          | 1.09328808                          | -1.8584888                            | -2.0661194                            | -1.3004132                            | -0.0807355                            | 0.61039612                            | 0.25737006                            | 6  | 4.9258E-06 | 5.30752676    | -3.0482609 | -16.178726   |
| VASP       | 2.63489824                          | 4.17600214                          | 2.56830986                          | 0.58691457                          | 0.99639828                          | 1.08489314                          | -0.5162191                            | -0.8071741                            | -1.0634558                            | -1.4465227                            | -0.9565859                            | -0.1098791                            | 7  | 2.9625E-05 | 4.52833946    | -2.8245422 | -12.790486   |
| HSP90AB1   | 1.47016361                          | 1.84039669                          | 1.67322309                          | 1.72689535                          | 1.60788503                          | 1.53327535                          | -0.7120177                            | -1.3043961                            | -1.3391449                            | -1.5852524                            | -0.8105087                            | -0.5632092                            | 8  | 3.0389E-07 | 6.51728751    | -2.6943947 | -17.560145   |
| CPNE1      | 0.9768267                           | 0.60084291                          | 0.0128995                           | 2.86095337                          | 2.64226193                          | 1.36071389                          | -1.4633596                            | -1.4305                               | -0.4840938                            | -1.2323325                            | -1.3584028                            | -1.3593068                            | 9  | 2.7572E-05 | 4.55952728    | -2.6304156 | -11.993452   |
| ADK        | 1.51648408                          | 1.4748986                           | 0.92632368                          | 1.40432134                          | 4.18378461                          | 1.93294709                          | 0.09932811                            | -1.0082134                            | 0.40833098                            | -1.2193113                            | -1.3160015                            | -1.1019378                            | 7  | 0.00042578 | 3.37081848    | -2.5960941 | -8.7509618   |
| FAM129B    | 1.38292094                          | 0.76926087                          | 0.98033403                          | 1.87935936                          | 1.51634698                          | 2.35018253                          | -1.5080963                            | -0.7423762                            | -1.9391738                            | -0.6786981                            | -0.4322927                            | 0.27913836                            | 7  | 1.4689E-05 | 4.83300158    | -2.3166506 | -11.196376   |
| EEF1A1P5   | 0.37378665                          | 0.14258342                          | -0.4991385                          | -0.0376672                          | 1.74454415                          | 2.0683976                           | 0.57692982                            | -1.4057746                            | -0.3364208                            | -3.1021187                            | -3.1599883                            | -2.5327523                            | 11 | 0.00204085 | 2.69018978    | -2.2921052 | -6.1661979   |
| SAMHD1     | 0.8911154                           | 1.16823003                          | 0.6678703                           | 1.47888282                          | 1.72178613                          | 1.45698701                          | -1.4253414                            | -0.9697274                            | -0.5793581                            | -0.8615193                            | -1.2253347                            | -1.1306562                            | 9  | 1.172E-07  | 6.93107594    | -2.2628015 | -15.683649   |
| CCT8       | 2.16566026                          | 1.94001562                          | 1.77634859                          | 1.30012612                          | 0.5730117                           | 0.55392483                          | -1.1862636                            | -1.0338909                            | -0.7658304                            | -0.5640122                            | -1.0995703                            | -0.2435353                            | 10 | 8.6796E-07 | 6.06150182    | -2.200365  | -13.337516   |
| MYH4       | -1.788927                           | -1.105392                           | -0.8975623                          | 0.88883895                          | 0.94526531                          | 0.55070887                          | -5.1552226                            | -0.3878293                            | -0.4636639                            | -3.1709049                            | -3.2629698                            | -2.1229333                            | 6  | 0.00046687 | 3.33080684    | -2.1927426 | -7.3036021   |
| CTSB       | 1.13119591                          | 1.21647278                          | 0.70767095                          | 1.19092048                          | 0.54100098                          | 1.20034405                          | -1.5416979                            | -0.881584                             | -1.8528587                            | -0.1624774                            | -1.0976189                            | -1.5410669                            | 8  | 2.4483E-05 | 4.61113635    | -2.1774848 | -10.040679   |
| HDGF       | 0.69855945                          | 1.70076101                          | 2.49910042                          | 1.74363211                          | 2.52895325                          | 2.22083219                          | -1.0708268                            | -1.346667                             | -1.4580333                            | 0.52963631                            | 1.43664608                            | 0.82390716                            | 10 | 0.00013276 | 3.87692353    | -2.0795293 | -8.0621761   |
| GPI        | 1.68105364                          | 1.01726279                          | 0.92644123                          | 1.20952219                          | 1.87340647                          | 1.49853378                          | 0.27795835                            | 0.27771246                            | 0.5173191                             | -2.0202414                            | -1.9669595                            | -1.2731686                            | 22 | 1.2103E-05 | 4.91710237    | -2.0656    | -10.156766   |
| SHMT2      | 1.19451711                          | 1.38350009                          | 0.69858966                          | 1.4559761                           | 2.03423779                          | 1.1140133                           | -1.0189742                            | -1.037953                             | -0.7304319                            | -0.8189548                            | -0.4316882                            | -0.4240789                            | 14 | 1.9214E-06 | 5.71638182    | -2.0571525 | -11.759469   |
| ATP2A2     | 1.31623951                          | 1.30124808                          | -0.0327544                          | 0.93083472                          | 1.11434389                          | 0.44477189                          | -0.7003134                            | -1.2681438                            | -1.0551548                            | -1.4206587                            | -1.7137125                            | -1.034963                             | 6  | 2.3707E-05 | 4.6251188     | -2.044605  | -9.4565408   |
| CHD4       | -0.3286263                          | 0.93375729                          | 1.62778825                          | 1.5867822                           | 2.81727863                          | 2.02964314                          | -1.1978267                            | -1.514054                             | -0.7739213                            | 0.14197179                            | 0.16545936                            | -0.1696906                            | 9  | 0.00017941 | 3.74616162    | -2.0024475 | -7.5014918   |
| LDHA       | 0.79932931                          | 0.61067971                          | 0.85754785                          | 2.45821909                          | 2.58174911                          | 1.44524619                          | 1.76131711                            | 1.45681423                            | 1.50476314                            | -2.3695625                            | -3.3996811                            | -2.1209567                            | 19 | 2.0529E-06 | 5.68763623    | -1.9866795 | -11.29951    |
| AKR1C2     | 2.35985764                          | 1.92246537                          | 1.27580154                          | 1.32600374                          | 1.14202006                          | 0.93158066                          | -0.140981                             | -0.4121091                            | -1.0357324                            | -0.3442383                            | -0.5302279                            | -0.4900118                            | 7  | 1.0468E-06 | 5.98014669    | -1.9851716 | -11.871617   |
| PRDX2      | 1.44064131                          | 1.15032541                          | 0.82571858                          | 2.10217603                          | 1.09542804                          | 2.19388949                          | -0.623228                             | 0.10858906                            | -0.8149452                            | -0.4938611                            | -0.3455722                            | -0.9321806                            | 7  | 3.3302E-05 | 4.47753592    | -1.9848961 | -8.8874438   |
| NPM1       | 1.05039677                          | 1.2645568                           | 1.00603709                          | 1.22758169                          | 1.93048251                          | 1.78055538                          | -1.478938                             | -2.1354266                            | -1.7241968                            | 0.50288014                            | 0.23008686                            | 1.04904982                            | 6  | 4.7745E-06 | 5.32107438    | -1.9693591 | -10.479106   |
| MYBBP1A    | 0.35282374                          | 1.48660662                          | 1.73689193                          | 0.13170055                          | 2.49190291                          | 2.10226298                          | -0.9902924                            | -2.993771                             | -0.5727178                            | 0.02578547                            | 0.6472583                             | 0.44004345                            | 20 | 0.00637138 | 2.1957665     | -1.9576471 | -4.2985359   |
| MCM5       | 0.88540435                          | 0.08702714                          | -0.0549968                          | 0.31205158                          | 0.62028139                          | 0.232303                            | -2.5510531                            | -1.7818967                            | -2.3900175                            | -0.9718933                            | -1.0956614                            | -0.8541732                            | 7  | 1.4211E-06 | 5.84737228    | -1.954461  | -11.428461   |
| BAG3       | 0.6120008                           | 1.6771179                           | 2.49600128                          | -0.1174796                          | 0.81648134                          | 1.32601765                          | -2.2460623                            | -1.8289545                            | -1.3451531                            | 0.53089312                            | -0.2279564                            | 0.20387999                            | 7  | 0.00170509 | 2.7682534     | -1.9539154 | -5.408933    |
| PIIB       | 0.86049715                          | 0.19140873                          | 0.38068338                          | 1.86510516                          | 0.90954365                          | -0.0535588                          | -0.5711285                            | 0.27986826                            | -0.3857795                            | -2.1940915                            | -2.624449                             | -1.9470083                            | 6  | 0.00056298 | 3.24950413    | -1.9327113 | -6.2803533   |
| RSL1D1     | 0.02683221                          | 0.99586895                          | 2.50301423                          | 1.75476527                          | 3.17505854                          | 1.99975801                          | -0.8384237                            | -1.7649042                            | -1.0081761                            | 0.25308393                            | 1.12055181                            | 1.11552425                            | 9  | 0.0017797  | 2.74965322    | -1.9296069 | -5.3057498   |
| XRCC6      | 1.39510262                          | 0.73707459                          | 0.29805729                          | 1.47241712                          | 1.66328478                          | 1.39722841                          | -0.3289685                            | -0.7490073                            | -0.8840618                            | -0.6951044                            | -1.1935615                            | -0.7624991                            | 31 | 2.5237E-06 | 5.59796652    | -1.9293946 | -10.800686   |

**Supplementary Table 1.** List of proteins that were upregulated or downregulated upon Trop2 knockdown in TNBC xenografts.

|          |            |            |            |            |            |            |            |            |            |            |            |            |    |            |            |            |            |
|----------|------------|------------|------------|------------|------------|------------|------------|------------|------------|------------|------------|------------|----|------------|------------|------------|------------|
| CAT      | 1.61544423 | 1.4787201  | 1.21409925 | 1.60446634 | 1.32324354 | 1.24870694 | -0.6456659 | 0.12998523 | -0.3804708 | -0.6746407 | -0.754189  | -0.4794081 | 26 | 2.90E-07   | 6.53824182 | -1.8815116 | -12.301778 |
| P4HB     | 1.21239257 | -0.0258031 | -0.3057262 | 1.49726423 | 0.30960097 | 1.34509725 | -0.648946  | 0.38923369 | -0.9140007 | -2.2097651 | -2.3284256 | -1.4608481 | 20 | 0.00088654 | 3.05230132 | -1.8675962 | -5.7004665 |
| UBA6     | 1.8661147  | 1.55474341 | -0.0596769 | 2.33362049 | 1.9107257  | 1.28628924 | 0.60152635 | -0.8201366 | -1.0362246 | 0.15425003 | -0.5312629 | -0.5860991 | 6  | 0.00060998 | 3.21468774 | -1.8516272 | -5.9524034 |
| EZR      | 1.10743643 | 1.23844147 | 0.86655726 | 1.6879029  | 1.1040754  | 1.01301072 | -1.7666729 | -0.5500953 | -1.1860796 | -0.2476805 | 0.01966301 | -0.2640191 | 11 | 1.2591E-05 | 4.89994859 | -1.8353848 | -8.993291  |
| ANP32A   | 1.37308056 | 1.0091989  | 1.06337787 | 1.58683006 | 1.7461701  | 0.56388012 | -0.7343602 | -0.166476  | -0.8987695 | -1.027002  | 0.06025762 | -0.6860764 | 8  | 4.2407E-05 | 4.37255772 | -1.7991607 | -7.8669339 |
| NEB      | 0.26193545 | 1.18683427 | 0.11576556 | 0.44620754 | 0.96560631 | 1.23491807 | -1.6577296 | -2.3299492 | -1.7504551 | -0.0275832 | -0.4652649 | -0.1521615 | 6  | 5.1335E-05 | 4.28958543 | -1.7657351 | -7.5742717 |
| MTDH     | 0.14489072 | 0.39829913 | 0.36937823 | 0.48278236 | 1.20223036 | 1.31167674 | -1.0955965 | -0.369791  | -0.6594174 | -2.0443783 | -0.9053129 | -1.0290837 | 8  | 6.9857E-05 | 4.15578826 | -1.6688062 | -6.9352053 |
| NAT10    | 0.88219433 | 0.99265608 | -0.1069159 | 0.5822346  | 0.3129521  | 0.9038733  | -0.9595883 | -1.8772127 | -0.3722405 | -1.1142185 | -1.4379078 | -0.4292816 | 6  | 0.00040205 | 3.39572512 | -1.6262407 | -5.5222663 |
| HSPH1    | 1.15754999 | 1.66333108 | 1.03677499 | 1.3567439  | 0.79176031 | 0.91438618 | -0.3410886 | 0.16175599 | 0.02671338 | -1.0590388 | -0.7180971 | -0.8220108 | 10 | 3.7157E-06 | 5.42996108 | -1.6120521 | -8.75338   |
| NCL      | 0.7389494  | 1.26538351 | 1.18617612 | 0.96137303 | 1.02573009 | 1.01979896 | -1.5286157 | -1.00494   | -0.7977414 | -0.4600487 | 0.26299074 | 0.14067165 | 23 | 1.3893E-05 | 4.8571917  | -1.5975158 | -7.7594402 |
| FAM213A  | 1.11377887 | 0.66247246 | 0.478695   | 0.8356151  | -0.3017522 | 0.93014986 | -1.4431693 | -0.4154712 | -1.015548  | -0.7566193 | -1.1997955 | -0.8512251 | 6  | 0.0002269  | 3.64416621 | -1.5667979 | -5.7096721 |
| HNRNPM   | 0.63125984 | 1.82406937 | 0.42632585 | 2.04221027 | -0.3223898 | 0.06493646 | -3.0897882 | -2.1228403 | -2.7567177 | 1.4290493  | 1.34179923 | 0.65472983 | 9  | 0.00116192 | 2.93482381 | -1.53503   | -4.5050425 |
| EEF1G    | 0.64773533 | 1.33276863 | 1.32494198 | 0.66210985 | 1.97100123 | 0.27587834 | -0.5274189 | -0.3644926 | -0.9563453 | -1.2471102 | 0.15523112 | 0.14192799 | 6  | 0.00053983 | 3.2677447  | -1.5021072 | -4.9085028 |
| QARS     | 1.10940038 | 0.75899353 | 1.06477994 | 0.03932231 | 0.61834402 | 1.19206407 | -0.8696858 | -1.6181043 | -1.0564603 | 0.13209313 | -0.295211  | -0.3002969 | 10 | 9.9884E-05 | 4.00050234 | -1.4650949 | -5.8611156 |
| AKR1C1   | 0.92930458 | 2.08377806 | 0.48927806 | 1.85801262 | 0.5028636  | 0.73618554 | 0.09602787 | 0.54071541 | 0.19239237 | -1.0697382 | -0.9161292 | -0.6540212 | 8  | 0.00171642 | 2.76537728 | -1.4016959 | -3.8762179 |
| ANXA11   | 0.10849584 | 0.50953241 | 0.69354538 | 1.11098622 | 1.34929665 | 1.13994636 | -0.0271671 | -1.4421375 | -0.6192058 | -0.3071034 | -0.4293239 | -0.3611081 | 6  | 2.9533E-06 | 5.52968564 | -1.3496414 | -7.4630929 |
| CCT3     | 1.21091424 | 0.75700374 | 1.11212018 | 0.9629854  | 1.02288969 | 0.87952521 | 0.57151024 | 0.05545714 | 0.69756014 | -1.03741   | -0.9858757 | -1.4448621 | 6  | 1.0827E-05 | 4.96549895 | -1.3481765 | -6.6943687 |
| NUMA1    | 0.83211116 | 1.06356208 | 0.74602596 | 0.67202966 | 0.97082775 | 0.53236255 | -0.674182  | -2.1704365 | -0.2990698 | -0.0319719 | -0.1917394 | 0.11563568 | 22 | 0.00024271 | 3.61491803 | -1.3447805 | -4.8612714 |
| TLN1     | 0.81763834 | 1.19199059 | -0.5708442 | 2.01638362 | 2.04166627 | 1.40186792 | -0.9188143 | -1.2087306 | -1.2447804 | 1.00424827 | 0.33677552 | 0.94584539 | 7  | 0.00102174 | 2.99066004 | -1.3306931 | -3.9796508 |
| LAMC2    | 1.06407777 | 0.72981386 | 0.87480011 | 0.95419633 | 0.94081323 | 0.23000419 | -1.735947  | -2.2741461 | -0.922689  | 0.69681224 | 0.51139752 | 0.57447849 | 7  | 0.00220821 | 2.65595866 | -1.3239666 | -3.5164004 |
| HIST2H3A | 0.51929959 | 0.82493081 | 0.49806842 | 1.05370714 | 0.60524716 | 0.11066122 | -1.1660266 | -0.3188365 | 0.21304851 | -1.008467  | -0.9389014 | -0.8669161 | 6  | 0.00034466 | 3.46261095 | -1.2830022 | -4.4425376 |
| HADHA    | 0.5160337  | -0.0776415 | -0.300626  | 0.99496251 | 1.03027206 | 1.03714104 | -0.4634308 | 0.295171   | -0.169304  | -1.5344994 | -1.2858135 | -1.0244748 | 26 | 6.5001E-05 | 4.18707952 | -1.2304156 | -5.1518478 |
| CCT2     | 0.47585414 | 0.43725875 | -0.439832  | 0.71136703 | 0.84003825 | 0.06294876 | -0.5506591 | -0.1227021 | -0.231926  | -1.2463444 | -1.5501567 | -1.5002797 | 7  | 0.00036548 | 3.43713318 | -1.2149505 | -4.1759466 |
| HSPA1A   | 0.72498552 | 0.53075065 | -0.1128531 | 0.87050185 | 1.30422152 | 1.72796667 | 0.6600449  | 0.65928007 | 0.43410936 | -1.6521959 | -1.3172044 | -0.8124436 | 28 | 0.00087472 | 3.0581318  | -1.1789971 | -3.6055286 |
| PDIA4    | 0.37760292 | 0.71503991 | 0.4286468  | 1.32070263 | 1.12507893 | 0.16597162 | -1.9312031 | -2.46845   | -1.1540064 | 0.51199833 | 1.34036283 | 0.82058311 | 20 | 0.00383927 | 2.41575091 | -1.1689597 | -2.8239154 |
| DDX21    | 1.1147468  | 1.17946789 | 0.89328418 | 0.19336452 | 0.85308921 | 0.48996807 | -1.2132742 | -1.808482  | -1.1301791 | 0.55030116 | 0.60627839 | 0.86992068 | 16 | 0.00021822 | 3.66110649 | -1.1415593 | -4.1793701 |
| FASN     | 0.6304411  | 1.01503842 | 0.70035089 | -0.0559759 | 0.63147201 | 0.65829844 | -0.1476923 | -0.7956668 | -0.6169078 | -0.0902933 | -0.9795582 | -0.5454562 | 54 | 0.00023696 | 3.62532184 | -1.1258666 | -4.0816287 |
| CCT6A    | 0.82890782 | 0.18281285 | -0.2495964 | 0.52648834 | 1.23568901 | 1.39265022 | 0.91652775 | 1.43162797 | 0.2063276  | -2.1003327 | -1.7403078 | -1.3837442 | 9  | 0.00032018 | 3.49460695 | -1.0978089 | -3.8364105 |
| PKM      | 0.07832307 | -0.0579022 | 0.66408387 | 1.29247688 | 2.40996462 | 1.67223116 | 0.85372706 | 0.56732178 | -0.2894053 | -0.9594187 | -0.7135283 | 0.06677207 | 17 | 0.00491263 | 2.3086863  | -1.0889515 | -2.5140473 |
| GOT2     | 1.10393864 | 0.85302242 | 0.6258546  | 0.53134811 | 0.48399114 | 0.30435721 | -1.1852688 | -0.3660641 | -0.8755445 | 0.34557055 | -0.2195264 | -0.3012318 | 7  | 0.00030493 | 3.51579594 | -1.0840962 | -3.811461  |
| HP1BP3   | 0.83889746 | 1.18599771 | 1.11771175 | 0.76456485 | 0.80401537 | 0.83837099 | -0.318327  | -0.2915765 | -0.3179846 | -0.4359397 | 0.23696014 | 0.32532343 | 6  | 7.5566E-06 | 5.12167277 | -1.0585171 | -5.421378  |
| EPPK1    | 0.45388294 | 0.43896296 | 0.1463327  | 0.77798043 | 1.30924769 | 1.29150919 | 0.42941713 | -0.8881404 | -0.4143202 | -0.4934779 | -0.2535515 | -0.0169896 | 23 | 0.0006274  | 3.20245407 | -1.0091631 | -3.2317983 |
| ALDH3A2  | 1.40944255 | 1.34415781 | 0.32094329 | 0.49187238 | 1.06899847 | 0.84256537 | -0.3953595 | 0.3377469  | 0.56393893 | -0.5331985 | -0.6148208 | 0.0673446  | 9  | 0.00175102 | 2.75670818 | -1.0087214 | -2.7807505 |
| VIM      | -0.9507555 | -1.0034062 | -1.1105638 | -0.4539277 | -1.6218804 | -1.3258462 | 0.31220412 | 0.78000032 | 0.35696265 | -0.2658377 | -0.6273    | -0.8511615 | 10 | 0.00014927 | 3.82603563 | 1.0285413  | 3.93523566 |
| CROCC    | -0.9424984 | -1.4315583 | -1.0955088 | -0.2260783 | -0.9029161 | -0.4458296 | 0.3519489  | -0.1034418 | -0.0994212 | 0.38090296 | 0.0258176  | 0.67042142 | 7  | 0.00014199 | 3.84773196 | 1.0451029  | 4.02127582 |
| MDH1     | -0.326145  | -1.2880537 | 0.03982029 | 0.09295907 | -0.6754106 | -0.0485851 | 1.76762613 | 1.89042632 | 1.47426995 | -0.08845   | 0.16157177 | -1.1141286 | 6  | 0.00446696 | 2.34998756 | 1.04945509 | 2.46620642 |

**Supplementary Table 1.** List of proteins that were upregulated or downregulated upon Trop2 knockdown in TNBC xenografts.

|         |            |            |            |            |            |            |            |            |            |            |            |            |     |            |            |            |            |
|---------|------------|------------|------------|------------|------------|------------|------------|------------|------------|------------|------------|------------|-----|------------|------------|------------|------------|
| ALDH1A1 | -0.1475397 | -0.8508591 | -0.0941785 | -1.288327  | -1.7627418 | -1.2656691 | 1.27143551 | 1.23385515 | 0.4844687  | -0.8867796 | -0.1189518 | -0.832969  | 15  | 0.00090269 | 3.04446115 | 1.09339572 | 3.32880078 |
| NUP153  | -0.4166496 | -0.4629211 | 0.42807558 | -0.6092747 | -0.2257773 | -0.8621629 | 0.2002325  | -0.7116813 | -0.4535586 | 1.31758002 | 2.00141707 | 2.11147748 | 7   | 0.00106816 | 2.97136365 | 1.10236286 | 3.27552094 |
| PRRC2A  | -0.0219635 | -0.7694169 | -1.0619523 | -0.0223772 | -0.7078586 | -0.948604  | -1.8548096 | -1.9883955 | -1.3136346 | 2.78680365 | 3.53439911 | 1.92943623 | 6   | 0.00014961 | 3.82504355 | 1.10432863 | 4.22410508 |
| TPD52L2 | -1.0148739 | -0.5991733 | -0.4189812 | -1.8218996 | -0.7458641 | -0.7012001 | 0.38741635 | 0.17757574 | 1.07088891 | 0.04285713 | -0.1416625 | 0.08417491 | 7   | 0.0008388  | 3.0763429  | 1.1538738  | 3.54971147 |
| PRDX3   | -2.0110888 | -1.8101638 | -1.0913489 | -1.2753016 | -1.545548  | -1.2755139 | 1.87086462 | 0.89569901 | 0.7304946  | -1.6994217 | -2.2695764 | -1.4545168 | 10  | 0.00055529 | 3.25547903 | 1.18041804 | 3.84282619 |
| MARS    | -0.5712896 | -1.0405097 | -0.3279386 | -1.3769921 | -1.2182089 | -0.954625  | 0.31182012 | 0.47964483 | 0.72985003 | -0.157635  | 0.4399223  | -0.0350832 | 13  | 3.9963E-05 | 4.3983405  | 1.20968048 | 5.32058667 |
| GSN     | -0.6281956 | -1.0864525 | -0.1229948 | -0.7681454 | -0.309848  | -0.4507451 | 2.5211783  | 1.06436238 | 0.31304544 | -0.1290367 | 0.27099389 | -0.0335146 | 7   | 0.00212024 | 2.67361599 | 1.22890171 | 3.28561125 |
| CCT5    | -0.7225692 | -0.6801768 | -1.3280442 | -0.9564386 | -2.0586402 | -1.6077504 | 0.87455603 | 1.1370931  | 1.13570722 | -0.7672581 | -0.8492805 | -1.1205623 | 14  | 0.0001339  | 3.87320693 | 1.29397915 | 5.01184901 |
| MYH2    | -1.874665  | -1.4013806 | -1.0031299 | -1.5239016 | -0.7214462 | -1.4230962 | 0.63634563 | 0.40358614 | -0.0905751 | 0.10309544 | -0.2195542 | -0.9959664 | 6   | 0.00066935 | 3.17434603 | 1.29742517 | 4.11847645 |
| AHNAK   | -0.5063758 | -1.0231869 | -0.6749779 | -0.6351022 | -1.3974336 | -0.9269893 | -0.3973786 | 0.3658113  | -0.0441168 | 1.04936441 | 1.14846534 | 0.66203594 | 223 | 0.00010893 | 3.96283463 | 1.32470787 | 5.24959821 |
| IQGAP1  | -1.2811937 | -0.9822384 | -0.5897586 | -0.7608518 | -1.8018272 | -1.0195979 | 2.05802599 | 1.37662082 | 0.61089648 | -0.4426509 | -1.4008908 | -0.4091775 | 29  | 0.00293732 | 2.53204872 | 1.37138193 | 3.47240587 |
| GDI2    | -1.3496343 | -1.8179858 | -1.5592936 | -0.9239483 | -1.340102  | -1.3057342 | 0.66737947 | 1.53086358 | 0.13683839 | -0.2831916 | -1.0420741 | -1.0603576 | 11  | 0.00129899 | 2.88639545 | 1.37435938 | 3.96694467 |
| DHX9    | -1.4012703 | -1.4268729 | -1.543709  | -0.6411211 | -0.803102  | -0.2575649 | 0.26362248 | 0.1671928  | 0.42373125 | 0.28335061 | 0.99325932 | 0.04865915 | 21  | 1.3279E-06 | 5.87683114 | 1.37557594 | 8.08402753 |
| HSPD1   | -1.2030644 | -0.9849702 | -1.0713278 | -1.5968733 | -1.1268876 | -1.1587676 | 2.18405199 | 1.56149247 | 1.17592869 | -1.1262068 | -2.1519536 | -0.3409762 | 20  | 0.00071895 | 3.14330206 | 1.40737123 | 4.42379288 |
| RRBP1   | -0.4934708 | -0.9752642 | 0.12036349 | -0.970778  | -1.03586   | -0.8687651 | -0.5124497 | -0.4541434 | 0.51517919 | 1.03433185 | 2.55858327 | 1.34426908 | 22  | 0.00280771 | 2.55164807 | 1.45159082 | 3.70394892 |
| FLNB    | -0.9053477 | -0.9943574 | -0.1142228 | -0.1872129 | -1.8356809 | -0.7632269 | 0.58319636 | 0.56450674 | 0.18307244 | 1.09588609 | 1.2157203  | 0.45209133 | 27  | 0.00059276 | 3.22711929 | 1.48242032 | 4.78394719 |
| ANXA2   | -0.4597762 | -0.508089  | -0.8752775 | -0.0807438 | -1.3287801 | -1.1509133 | 0.41259501 | 1.18189987 | -0.4454228 | 1.10273772 | 1.53608183 | 0.94391827 | 13  | 0.00096649 | 3.01480357 | 1.52256497 | 4.5902343  |
| RCC1    | 0.00715409 | -0.8487536 | -0.3969391 | -1.345094  | -1.4967879 | -1.3601743 | 1.70497756 | 1.70169597 | 1.31180076 | -0.4468556 | -0.4422969 | -0.0116365 | 6   | 4.0256E-06 | 5.39517226 | 1.54304669 | 8.32500271 |
| PAICS   | -1.2002744 | -2.1796943 | -1.473926  | -1.0673112 | -2.4895351 | -1.8282193 | 1.37014733 | 0.99521473 | 0.9110683  | -1.1848853 | -1.422248  | -1.3224736 | 7   | 0.0003455  | 3.46155193 | 1.59763062 | 5.53028137 |
| SORD    | -1.844065  | -1.5708957 | -1.4628461 | 0.09038022 | -1.6377584 | -1.503455  | 1.69926393 | 1.56408482 | 2.46612758 | -1.6155934 | -0.6382381 | -1.5712846 | 7   | 0.00021787 | 3.66179582 | 1.63883337 | 6.00107317 |
| G3BP1   | -0.6650733 | -1.0808173 | -1.272667  | -0.5052922 | -2.0228566 | -0.6661732 | -0.2071249 | 0.48864365 | 0.53145315 | 1.36549369 | 1.0524644  | 0.48228386 | 6   | 0.00026547 | 3.57597809 | 1.6543489  | 5.91591543 |
| GAPDH   | -0.9794866 | -2.0620965 | -1.5726908 | -1.7295762 | -1.5292283 | -0.7677949 | 2.34200439 | 2.15091034 | 0.97338528 | -1.5805366 | -1.8218958 | -0.7173269 | 23  | 0.0030077  | 2.52176575 | 1.664569   | 4.19765309 |
| TMPO    | -0.3201313 | -1.6880103 | -1.1888718 | -0.3724946 | -0.8801404 | -0.725975  | 0.86369597 | 0.1410226  | 1.08715553 | 0.33768561 | 1.39039575 | 1.21282619 | 11  | 0.00023475 | 3.62939118 | 1.70140085 | 6.17504922 |
| DSG2    | -2.3030487 | -2.5046026 | -0.7712189 | -2.2216537 | -2.8487306 | -0.7957393 | 1.44025597 | 0.24960169 | 0.53065642 | -0.8479677 | -1.6328707 | -0.8554106 | 17  | 0.0044789  | 2.34882862 | 1.72154317 | 4.04360987 |
| ACTN4   | -0.3142345 | -1.5499427 | -0.6660334 | -1.3469131 | -2.0429116 | -0.9763084 | 0.19939959 | 1.20921511 | 0.07230395 | 0.83633779 | 0.63677907 | 0.4856901  | 10  | 0.00018237 | 3.73904352 | 1.72267821 | 6.44116881 |
| ANXA1   | -0.8081599 | -1.805513  | -1.4097116 | -0.7515575 | -2.0674545 | -1.4813612 | 0.27168537 | 0.62322559 | 0.1050281  | 0.55704394 | 0.3385346  | 0.18894216 | 25  | 7.28E-05   | 4.13786976 | 1.73470291 | 7.17797473 |
| BCLAF1  | -1.0440102 | -0.8159437 | -0.523881  | -0.790351  | -0.9090324 | -0.5606392 | 0.83034434 | 1.51913847 | 0.24926774 | 0.79229492 | 1.04083015 | 1.48209568 | 7   | 1.6543E-05 | 4.78138119 | 1.75963814 | 8.41350071 |
| LARS    | -1.4043413 | -1.049889  | -0.7619898 | -1.4159035 | -0.9043648 | -1.1410854 | 1.48863015 | 1.44188734 | 1.13739217 | 0.17680801 | -0.1109292 | -0.0264475 | 7   | 8.5369E-07 | 6.0686997  | 1.79748579 | 10.9084015 |
| ACBD3   | -1.2398802 | -1.6918393 | -1.6669481 | 0.39851416 | -1.428374  | -1.6514115 | -0.2209118 | -0.2634142 | 1.57489151 | 1.46895977 | 0.48453189 | 0.71871645 | 6   | 0.00255972 | 2.59180819 | 1.84045208 | 4.77009878 |
| TNC     | -1.7493248 | -2.4454955 | -2.8219892 | -2.254466  | -2.490311  | -1.851524  | 0.76452535 | 0.94380003 | 0.55658859 | -1.0969378 | -2.1139981 | -1.2861211 | 48  | 9.5191E-05 | 4.02140409 | 1.89682788 | 7.6279114  |
| PTBP1   | -1.6382822 | -0.7229893 | -1.232873  | -0.9712928 | -2.4224557 | -2.9218632 | 1.71147161 | 1.87671837 | 1.60066307 | -1.0854228 | -1.1129171 | -1.5155742 | 13  | 0.00010051 | 3.99778397 | 1.89744922 | 7.58559207 |
| CLIC1   | -1.5874826 | -0.5608649 | -2.1538849 | -2.3378371 | -0.5955738 | -0.7411721 | 2.25815459 | 1.2394261  | 1.10295452 | -0.1715846 | -0.4199723 | -0.5167614 | 8   | 0.00152829 | 2.81579362 | 1.9115054  | 5.38240471 |
| HADHB   | -1.005437  | -1.2325155 | -1.2440735 | -1.1082437 | -1.6399129 | -0.8960276 | 0.99731357 | 1.58073903 | 1.40200173 | 0.15349537 | 0.27215308 | -0.0429139 | 12  | 9.6435E-07 | 6.01576399 | 1.91483318 | 11.5191845 |
| EEF1B2  | -1.7210454 | -2.1153667 | -1.2063933 | -1.9118965 | -1.1172341 | -1.4155481 | 1.60762055 | 0.45358326 | 1.02505845 | -0.4727984 | -0.2286829 | -0.2895696 | 6   | 2.8034E-05 | 4.55231415 | 1.93044924 | 8.78801141 |
| COL18A1 | -0.7703436 | -1.6875745 | -0.4980778 | -1.5812183 | -1.7179512 | -1.6210419 | 1.19862883 | 0.79876245 | 0.94162235 | 0.29753989 | 0.38090825 | 0.16414343 | 7   | 9.0609E-08 | 7.04283001 | 1.94296874 | 13.6839986 |
| GOT1    | -2.0686667 | -1.4038679 | -1.1901405 | -2.6336861 | -0.831726  | -1.2568875 | 0.34446808 | 2.48087006 | 0.5000767  | -0.4201093 | -0.1053109 | -0.345204  | 9   | 0.00181247 | 2.74172987 | 1.9732942  | 5.41023964 |

**Supplementary Table 1.** List of proteins that were upregulated or downregulated upon Trop2 knockdown in TNBC xenografts.

|         |            |            |            |            |            |            |            |            |            |            |            |            |    |            |            |            |            |
|---------|------------|------------|------------|------------|------------|------------|------------|------------|------------|------------|------------|------------|----|------------|------------|------------|------------|
| FLNA    | -1.9791659 | -2.4911905 | -1.7291281 | -1.5592676 | -1.95403   | -1.3841803 | -0.044846  | 0.02837591 | -0.0333982 | 0.71277471 | 0.21660799 | -0.1034598 | 28 | 2.2756E-06 | 5.6429092  | 1.97883615 | 11.1663927 |
| AIFM1   | -1.9816907 | -0.9614079 | 0.85459458 | -2.0381602 | -1.905117  | -0.9963347 | 1.37846806 | 2.00443035 | 1.57800876 | -0.373262  | 0.59124419 | 0.33082478 | 7  | 0.0006952  | 3.15788712 | 2.08963835 | 6.59884203 |
| PFN1    | -1.2573299 | -2.0169485 | -1.5715483 | -2.0887463 | -2.7740702 | -1.5494565 | 1.21428449 | 0.44528784 | 0.62122178 | -0.1811831 | -0.3269194 | -0.3895967 | 9  | 1.2245E-05 | 4.91203879 | 2.10686576 | 10.3490064 |
| BASP1   | -2.8528619 | -2.1527465 | -0.6016897 | -0.6297752 | 0.00743098 | -0.1832325 | 0.65252865 | -0.213618  | -0.8937275 | 2.56202603 | 2.57483363 | 1.72647275 | 10 | 0.00016239 | 3.78944377 | 2.13689838 | 8.09765625 |
| C1QBP   | -2.0216577 | -2.5268939 | -1.8474369 | -2.1027043 | -2.5874438 | -2.9199923 | 1.75870237 | 0.18627429 | 0.64596232 | -1.3536931 | -1.4517409 | -0.8535419 | 8  | 4.9778E-05 | 4.30296321 | 2.15634865 | 9.2786889  |
| SMARCA4 | -2.1583276 | -1.2433531 | -1.2919246 | -2.1860842 | -1.0939311 | -0.5365    | 0.14296328 | 0.75202293 | 1.07039676 | 0.75484265 | 1.17117368 | 0.54710002 | 6  | 8.2196E-05 | 4.08514789 | 2.15810332 | 8.81617124 |
| TPI1    | -1.3051308 | -1.7819592 | -1.2151895 | -0.9965425 | -1.5527163 | -1.6514699 | 1.6236326  | 1.134824   | 1.48182823 | 0.24303581 | 0.14913211 | -0.1481841 | 6  | 7.7173E-07 | 6.11253631 | 2.16454615 | 13.230867  |
| DSC3    | -1.6690317 | -0.3338609 | 0.46660097 | -2.8004338 | -0.7847032 | -0.7804923 | 0.32760641 | 0.91291956 | 0.62023947 | 2.17429605 | 2.43909779 | 0.69435197 | 6  | 0.00312872 | 2.50463307 | 2.17840538 | 5.45610616 |
| CAD     | -1.3346079 | -0.6768954 | -1.935009  | -0.0900658 | -0.9560605 | -1.1616625 | 1.16919198 | 1.43302362 | 0.37328892 | 1.93178734 | 0.76731587 | 1.35497943 | 10 | 9.964E-05  | 4.00156476 | 2.19731471 | 8.79269709 |
| TRIM29  | -0.0240117 | -0.8132817 | -1.3344435 | 0.5219091  | -0.8355956 | -1.4488048 | 1.50933159 | 2.44797316 | 1.45491007 | 1.37530696 | 1.3143281  | 1.16850822 | 12 | 0.00023524 | 3.62849139 | 2.20076437 | 7.98545456 |
| ATP5O   | -0.4581525 | -1.0312886 | -1.5145799 | -2.9608339 | -2.4540503 | -1.5186417 | 1.53513483 | 2.85823301 | 1.8093131  | -0.7348009 | -0.8283583 | -1.1411145 | 6  | 0.00012202 | 3.91355264 | 2.23932568 | 8.76371894 |
| IARS2   | -0.8646389 | -1.0346046 | -1.3427601 | -1.5010594 | -2.3302676 | -1.7962959 | 0.33977642 | 1.06176572 | 0.76867895 | 1.99162999 | 1.60104719 | 1.18830469 | 7  | 9.97E-07   | 6.00130498 | 2.63680491 | 15.8242704 |
| RTN4    | -1.3313878 | -1.5759522 | -2.0965939 | -2.9850719 | -3.3010079 | -0.9617905 | 1.60465361 | -0.1494841 | 0.53440507 | 1.20095738 | 0.56667192 | 0.46310106 | 6  | 0.00020508 | 3.68808069 | 2.74535151 | 10.1250779 |
| CALR    | -2.4319574 | -2.839013  | -2.4245375 | -0.7686305 | -2.1248705 | -2.1739369 | 1.66117674 | 0.92441359 | 1.59312968 | 0.30291526 | -0.2250231 | -0.4838351 | 17 | 5.1088E-06 | 5.29168452 | 2.75595379 | 14.583638  |
| FUBP3   | -1.8721046 | -2.1704808 | -1.1836352 | -2.0954343 | -1.3938954 | -1.9730031 | 0.50066665 | 0.43776378 | 1.65729163 | 1.66702062 | 0.69795409 | 1.22761748 | 8  | 6.3426E-06 | 5.19773457 | 2.81281127 | 14.6202464 |
| SLC25A3 | -1.7945734 | -2.1367874 | -0.9721683 | -1.2361918 | -2.8309661 | -3.5673868 | 1.54978082 | 0.63829954 | 0.87698053 | 0.65732901 | 0.71616786 | 0.33503246 | 6  | 4.2456E-05 | 4.37206595 | 2.88527735 | 12.6146229 |
| CAST    | -1.8730503 | -1.6742304 | -1.1828174 | -2.3077395 | -1.4434522 | -1.1374921 | 0.79845273 | 2.01457064 | 1.08850122 | 1.62764691 | 2.25859678 | 0.20314883 | 30 | 3.0951E-05 | 4.50932318 | 2.93494983 | 13.2346373 |
| FABP5   | -1.7861166 | -1.6286718 | -0.8067726 | -1.4729329 | 0.00486169 | -1.098987  | 2.37999588 | 3.42914057 | 1.99104244 | 1.15250279 | 1.58912256 | 0.30317939 | 14 | 5.1861E-05 | 4.28516275 | 2.9389338  | 12.5938097 |
| GSTP1   | -2.1399842 | -2.2949315 | -1.5835765 | -2.9536209 | -3.7161151 | -2.2797891 | 1.50276805 | 1.00633368 | 1.15049715 | 0.29634429 | 0.30622581 | 0.14579766 | 27 | 3.7397E-07 | 6.42715872 | 3.22933066 | 20.7554207 |
| CDH1    | -1.9873081 | -2.8039221 | -2.1812196 | -3.6264247 | -2.7600708 | -2.6208893 | 2.48544719 | 2.60114117 | 2.13194459 | -0.4028647 | -0.5449361 | -0.9515342 | 7  | 1.9895E-07 | 6.7012669  | 3.54983877 | 23.788417  |
|         |            |            |            |            |            |            |            |            |            |            |            |            |    |            |            |            |            |
| Trop2   | 1.05583537 | 0.49831918 | 0.53005653 | 1.24482341 | 0.76655029 | 0.81078087 | 0.02516957 | 0.72899298 | -1.0091305 | -0.1824754 | -0.231808  | -0.1513922 | 3  | 0.00040787 | 3.38947891 | -0.9545015 | -3.2352628 |
|         |            |            |            |            |            |            |            |            |            |            |            |            |    |            |            |            |            |
